# Supplementary material for: Kohortentrends in schulfachbezogenen Selbstkonzepten und Interessen bei Mädchen und Jungen
Source: Atypon-hosted journal article supplement (doi:10.1024/1010-0652/a000346), 2022-04-19
Supplement: 1010-0652_a000346_esm1.pdf [file 1010-0652_a000346_esm1.pdf]

**Tabelle ESM1.1.** Bisher vorliegende empirische Befunde zu Kohortenunterschieden in fachbezogenen motivationalen Variablen sowie Leistungen für Sekundarschülerinnen und -schüler (neunte Jahrgangsstufe bzw. 15-Jährige; alle Kohortentrends in Effektstärkenmetrik *d*)

| Fach                             | Studie        | Referenz                                             | T1   | T2           | Konstrukt                 | T2 – T1                  |                          |                          |
|----------------------------------|---------------|------------------------------------------------------|------|--------------|---------------------------|--------------------------|--------------------------|--------------------------|
|                                  |               |                                                      |      |              |                           | gesamt                   | Mädchen                  | Jungen                   |
| Mathematik                       | BERLIN-Studie | Jansen et al. (2017) <sup>d</sup>                    | 2011 | 2014         | Selbstkonzept             | -0.02                    | --                       | --                       |
|                                  |               | Jansen et al. (2017) <sup>d</sup>                    | 2011 | 2014         | Intrinsischer Wert        | <b>-0.12</b>             | --                       | --                       |
|                                  |               | Becker et al. (2017) <sup>e</sup>                    | 2011 | 2014         | Testleistung              | -0.10                    | --                       | --                       |
|                                  | IQB-BT        | Jansen et al. (2019) <sup>f</sup>                    | 2012 | 2018         | Selbstkonzept             | <b>-0.05</b>             | <b>0.06</b>              | <b>-0.16</b>             |
|                                  |               | Jansen et al. (2019) <sup>f</sup>                    | 2012 | 2018         | Interesse                 | <b>-0.18</b>             | <b>-0.05</b>             | <b>-0.31</b>             |
|                                  |               | Schipolowski et al. (2019) <sup>g</sup>              | 2012 | 2018         | Testleistung              | -0.01 <sup>a</sup>       | 0.03 <sup>a</sup>        | <b>-0.06<sup>a</sup></b> |
|                                  | PISA          | Schiepke-Tiska & Schmidtner (2013) <sup>h</sup>      | 2003 | 2012         | Selbstkonzept             | n.sig. <sup>b</sup>      | n. sig. <sup>b</sup>     | --                       |
|                                  |               | Schiepke-Tiska & Schmidtner (2013) <sup>h</sup>      | 2003 | 2012         | Freude und Interesse      | sig. neg. <sup>b</sup>   | sig. neg. <sup>b</sup>   | sig. neg. <sup>b</sup>   |
|                                  |               | Schiepke-Tiska & Schmidtner (2013) <sup>h</sup>      | 2003 | 2012         | Selbstwirksamkeit         | sig. pos. <sup>b</sup>   | sig. pos. <sup>b</sup>   | sig. pos. <sup>b</sup>   |
|                                  |               | Schiepke-Tiska & Schmidtner (2013) <sup>h</sup>      | 2003 | 2012         | Instrumentelle Motivation | n. sig. <sup>b</sup>     | --                       | --                       |
| OECD (2004, 2014) <sup>i,j</sup> |               | 2003                                                 | 2012 | Testleistung | <b>0.11<sup>a</sup></b>   | n. sig. <sup>b</sup>     | sig. pos. <sup>b</sup>   |                          |
| Naturwissenschaften              | PISA          | Schiepke-Tiska, Simm et al. (2016) <sup>k</sup>      | 2006 | 2015         | Freude und Interesse      | sig. neg. <sup>b</sup>   | sig. neg. <sup>b</sup>   | n. sig. <sup>b</sup>     |
|                                  |               | Schiepke-Tiska, Simm et al. (2016) <sup>k</sup>      | 2006 | 2015         | Selbstwirksamkeit         | sig. neg. <sup>b</sup>   | sig. neg. <sup>b</sup>   | n. sig. <sup>b</sup>     |
|                                  |               | Schiepke-Tiska, Simm et al. (2016) <sup>k</sup>      | 2006 | 2015         | Instrumentelle Motivation | sig. neg. <sup>b</sup>   | sig. neg. <sup>b</sup>   | sig. neg. <sup>b</sup>   |
|                                  |               | Schiepke-Tiska, Rönnebeck et al. (2016) <sup>l</sup> | 2006 | 2015         | Testleistung              | -0.07 <sup>a</sup>       | <b>-0.08<sup>a</sup></b> | -0.05 <sup>a</sup>       |
| Physik                           | IQB-BT        | Jansen et al. (2019) <sup>f</sup>                    | 2012 | 2018         | Selbstkonzept             | <b>-0.05</b>             | 0.05                     | <b>-0.15</b>             |
|                                  |               | Jansen et al. (2019) <sup>f</sup>                    | 2012 | 2018         | Interesse                 | <b>-0.04</b>             | <b>0.06</b>              | <b>-0.13</b>             |
|                                  |               | Schipolowski et al. (2019) <sup>g</sup>              | 2012 | 2018         | Testleistung (Fachwissen) | <b>-0.03<sup>a</sup></b> | -0.02 <sup>a</sup>       | -0.03 <sup>a</sup>       |
| Chemie                           | IQB-BT        | Jansen et al. (2019) <sup>f</sup>                    | 2012 | 2018         | Selbstkonzept             | <b>-0.06</b>             | -0.03                    | <b>-0.08</b>             |
|                                  |               | Jansen et al. (2019) <sup>f</sup>                    | 2012 | 2018         | Interesse                 | -0.03                    | 0.01                     | <b>-0.07</b>             |
|                                  |               | Schipolowski et al. (2019) <sup>g</sup>              | 2012 | 2018         | Testleistung (Fachwissen) | <b>-0.06<sup>a</sup></b> | -0.04 <sup>a</sup>       | -0.07 <sup>a</sup>       |
| Biologie                         | IQB-BT        | Jansen et al. (2019) <sup>f</sup>                    | 2012 | 2018         | Selbstkonzept             | <b>-0.08</b>             | -0.03                    | <b>-0.12</b>             |
|                                  |               | Jansen et al. (2019) <sup>f</sup>                    | 2012 | 2018         | Interesse                 | <b>-0.04</b>             | <b>0.05</b>              | <b>-0.14</b>             |
|                                  |               | Schipolowski et al. (2019) <sup>g</sup>              | 2012 | 2018         | Testleistung (Fachwissen) | <b>-0.03<sup>a</sup></b> | -0.02 <sup>a</sup>       | -0.03 <sup>a</sup>       |
| Deutsch                          | BERLIN-Studie | Jansen et al. (2017) <sup>d</sup>                    | 2011 | 2014         | Selbstkonzept             | <b>-0.07</b>             | --                       | --                       |
|                                  |               | Jansen et al. (2017) <sup>d</sup>                    | 2011 | 2014         | Intrinsischer Wert        | <b>-0.11</b>             | --                       | --                       |

|       |      |                                                                                                 |      |      |                          |                         |                        |                        |
|-------|------|-------------------------------------------------------------------------------------------------|------|------|--------------------------|-------------------------|------------------------|------------------------|
|       |      | Becker et al. (2017) <sup>e</sup>                                                               | 2011 | 2014 | Testleistung Lesen       | -0.13                   | --                     | --                     |
| Lesen | PISA | Artelt et al. (2010) <sup>m</sup>                                                               | 2000 | 2009 | Lese Freude <sup>c</sup> | sig. pos. <sup>b</sup>  | n. sig. <sup>b</sup>   | sig. pos. <sup>b</sup> |
|       |      | OECD & UNESCO Institute for Statistics (2003) <sup>n</sup> , OECD (2010a, 2010b) <sup>o,p</sup> | 2000 | 2009 | Testleistung             | <b>0.13<sup>a</sup></b> | sig. pos. <sup>b</sup> | n. sig. <sup>b</sup>   |
|       |      | Diedrich et al. (2019) <sup>q</sup>                                                             | 2009 | 2018 | Lese Freude <sup>c</sup> | sig. neg. <sup>b</sup>  | sig. neg. <sup>b</sup> | sig. neg. <sup>b</sup> |
|       |      | OECD (2010b, 2019a, 2019b) <sup>p,r,s</sup>                                                     | 2009 | 2018 | Testleistung             | 0.01 <sup>a</sup>       | --                     | --                     |

Anmerkung: BT = IQB-Bildungstrend.

<sup>a</sup> Die Effektstärke für den Kohortenunterschied ist auf Grundlage der in den Referenzen angegebenen Mittelwerte und Standardabweichungen von den Autoren des vorliegenden Beitrags berechnet worden. Dabei wurden gleich große Teilstichproben für Mädchen und Jungen angenommen. Das Signifikanzniveau kann den Referenzen entnommen werden (signifikante Unterschiede sind fett gedruckt).

<sup>b</sup> In den Referenzen sind keine Mittelwerte und Standardabweichungen zur Berechnung der Effektstärke für den Kohortenunterschied angegeben. Es liegen jedoch Angaben zum Signifikanzniveau vor. n. sig. = nicht signifikant, sig. pos. = signifikant positiv, sig. neg. = signifikant negativ.

<sup>c</sup> In den PISA-Erhebungen ist Lese Freude nicht speziell auf den schulischen Bereich bezogen, sondern genereller erfasst worden. Siehe dazu auch Artelt et al. (2010).

<sup>d</sup> Jansen, M., Stäbler, F., Becker, M. & Neumann, M. (2017). Motivationale Orientierungen und Aspekte schulischen Wohlbefindens vor und nach der Berliner Schulstrukturreform. In M. Neumann, M. Becker, J. Baumert, K. Maaz & O. Köller (Hrsg.), *Zweigliedrigkeit im deutschen Schulsystem. Potenziale und Herausforderungen in Berlin* (S. 295–320). Münster: Waxmann.

<sup>e</sup> Becker, M., Neumann, M., Radmann, S., Jansen, M., Nagy, G., Borzikowsky, C., .... Baumert, J. (2017). Schulleistungen vor und nach der Berliner Schulstrukturreform. In M. Neumann, M. Becker, J. Baumert, K. Maaz & O. Köller (Hrsg.), *Zweigliedrigkeit im deutschen Schulsystem. Potenziale und Herausforderungen in Berlin* (S. 155–188). Münster: Waxmann.

<sup>f</sup> Jansen, M., Schneider, R., Schipolowski, S. & Henschel, S. (2019). Motivationale Schülermerkmale im Fach Mathematik und in den naturwissenschaftlichen Fächern. In P. Stanat, S. Schipolowski, N. Mahler, S. Weirich & S. Henschel (Hrsg.), *IQB-Bildungstrend 2018. Mathematische und naturwissenschaftliche Kompetenzen am Ende der Sekundarstufe I im zweiten Ländervergleich* (S. 337–354). Münster: Waxmann.

<sup>g</sup> Schipolowski, S., Wittig, J., Mahler, N. & Stanat, P. (2019). Geschlechtsspezifische Disparitäten. In P. Stanat, S. Schipolowski, N. Mahler, S. Weirich & S. Henschel (Hrsg.), *IQB-Bildungstrend 2018. Mathematische und naturwissenschaftliche Kompetenzen am Ende der Sekundarstufe I im zweiten Ländervergleich* (S. 237–263). Münster: Waxmann.

<sup>h</sup> Schiepe-Tiska, A. & Schmidtner, S. (2013). Mathematikbezogene emotionale und motivationale Orientierungen, Einstellungen und Verhaltensweisen von Jugendlichen in PISA 2012. In M. Prenzel, C. Sälzer, E. Klieme & O. Köller (Hrsg.), *PISA 2012. Fortschritte und Herausforderungen in Deutschland* (S. 99–122). Münster: Waxmann.

<sup>i</sup> OECD. (2004). *Learning for tomorrow's world. First results from PISA 2003*. Paris, France: OECD Publishing.

- <sup>j</sup> OECD. (2014). PISA 2012 Results: What students know and can do. Student performance in mathematics, reading and science (Vol. 1, rev. ed., February 2014). Paris, France: OECD Publishing.
- <sup>k</sup> Schiepe-Tiska, A., Simm, I. & Schmidtner, S. (2016). Motivationale Orientierungen, Selbstbilder und Berufserwartungen in den Naturwissenschaften in PISA 2015. In K. Reiss, C. Sälzer, A. Schiepe-Tiska, E. Klieme & O. Köller (Hrsg.), PISA 2015. Eine Studie zwischen Kontinuität und Innovation (S. 99–132). Münster: Waxmann.
- <sup>l</sup> Schiepe-Tiska, A., Rönnebeck, S., Schöps, K., Neumann, K., Schmidtner, S., Parchmann, I. & Prenzel, M. (2016). Naturwissenschaftliche Kompetenz in PISA 2015—Ergebnisse des internationalen Vergleichs mit einem modifizierten Testansatz. In K. Reiss, C. Sälzer, A. Schiepe-Tiska, E. Klieme & O. Köller (Hrsg.), PISA 2015. Eine Studie zwischen Kontinuität und Innovation (S. 45–98). Münster, New York: Waxmann.
- <sup>m</sup> Artelt, C., Naumann, J. & Schneider, W. (2010). Lesemotivation und Lernstrategien. In E. Klieme, C. Artelt, J. Hartig, N. Jude, O. Köller, M. Prenzel, ... P. Stanat (Hrsg.), PISA 2009. Bilanz nach einem Jahrzehnt (S. 73–112). Münster: Waxmann.
- <sup>n</sup> OECD & UNESCO Institute for Statistics. (2003). Literacy skills for the world of tomorrow. Further results from PISA 2000. Paris, France: OECD Publishing.
- <sup>o</sup> OECD. (2010a). PISA 2009 Results: Learning Trends. Changes in student performance since 2000 (Vol. 5). Paris, France: OECD Publishing.
- <sup>p</sup> OECD. (2010b). PISA 2009 Results: What students know and can do. Student performance in reading, mathematics and science (Vol. 1). Paris, France: OECD Publishing.
- <sup>q</sup> Diedrich, J., Schiepe-Tiska, A., Ziernwald, L., Tupac-Yupanqui, A., Weis, M., McElvany, N. & Reiss, K. (2019). Lesebezogene Schülermerkmale in PISA 2018: Motivation, Leseverhalten, Selbstkonzept und Lesestrategiewissen. In K. Reiss, M. Weis, E. Klieme & O. Köller (Hrsg.), PISA 2018. Grundbildung im internationalen Vergleich (S. 81–109). Münster: Waxmann.
- <sup>r</sup> OECD. (2019a). PISA 2018 Results: What students know and can do (Vol. 1). Paris, France: OECD Publishing.
- <sup>s</sup> OECD. (2019b). PISA 2018 Results: Where all students can succeed (Vol. 2). Paris, France: OECD Publishing.
