# Supplementary material for: Kohortentrends in schulfachbezogenen Selbstkonzepten und Interessen bei Mädchen und Jungen
Source: Atypon-hosted journal article supplement (doi:10.1024/1010-0652/a000346), 2022-04-19
Supplement: 1010-0652_a000346_esm2.pdf [file 1010-0652_a000346_esm2.pdf]

**Tabelle ESM2.1.** Stichprobengrößen sowie Reliabilitäten der Selbstkonzept- und Interessensskalen pro Fach und Studie

| Fach                            | Mathematik |       | Physik |       | Chemie |       | Biologie |       | Deutsch |       |
|---------------------------------|------------|-------|--------|-------|--------|-------|----------|-------|---------|-------|
|                                 | LV12       | BT18  | LV12   | BT18  | LV12   | BT18  | LV12     | BT18  | LV09    | BT15  |
| $N_{\text{Schüler}}$            | 24709      | 25371 | 24796  | 25541 | 24796  | 25541 | 24796    | 25541 | 36570   | 32171 |
| $n_{\text{weiblich}}$           | 12093      | 12158 | 12145  | 12272 | 12145  | 12272 | 12145    | 12272 | 17793   | 15869 |
| $n_{\text{männlich}}$           | 12616      | 13213 | 12651  | 13269 | 12651  | 13269 | 12651    | 13269 | 18777   | 16302 |
| $\alpha_{\text{Selbstkonzept}}$ | .87        | .86   | .78    | .83   | .82    | .79   | .80      | .79   | .88     | .87   |
| $\alpha_{\text{Interesse}}$     | .91        | .91   | .92    | .93   | .92    | .91   | .90      | .91   | ---     | ---   |

*Anmerkungen:* LV = IQB-Ländervergleich, BT = IQB-Bildungstrend. Nähere Informationen zu den Skalen im LV09, LV12 und BT15 können den entsprechenden Skalenhandbüchern entnommen werden<sup>1</sup>. Das Skalenhandbuch zum BT18 erscheint zeitnah. Eine genaue Beschreibung der Anlage und Durchführung der IQB-Studien findet sich in den entsprechenden Berichtsbänden<sup>2</sup>.

<sup>1</sup>Skalenhandbücher:

- Lenski, A. E., Hecht, M., Penk, C., Milles, F., Mezger, M., Heitmann, P., Stanat, P. & Pant, H. A. (2016). *IQB-Ländervergleich 2012. Skalenhandbuch zur Dokumentation der Erhebungsinstrumente*. Berlin: Humboldt-Universität zu Berlin, Institut zur Qualitätsentwicklung im Bildungswesen.
- Sachse, K., Kretschmann, J., Kocaj, A., Köller, O., Knigge, M. & Tesch, B. (2012). *IQB-Ländervergleich 2008/2009. Skalenhandbuch zur Dokumentation der Erhebungsinstrumente*. Berlin: Institut zur Qualitätsentwicklung im Bildungswesen.
- Schipolowski, S., Haag, N., Milles, F., Pietz, S. & Stanat, P. (2018). *IQB-Bildungstrend 2015. Skalenhandbuch zur Dokumentation der Erhebungsinstrumente in den Fächern Deutsch und Englisch*. Berlin: Institut zur Qualitätsentwicklung im Bildungswesen.

<sup>2</sup>Berichtsbände:

- Köller, O., Knigge, M. & Tesch, B. (Hrsg.). (2010). *Sprachliche Kompetenzen im Ländervergleich*. Münster: Waxmann.
- Pant, H. A., Stanat, P., Schroeders, U., Roppelt, A., Siegle, T. & Pöhlmann, C. (Hrsg.). (2013). *IQB-Ländervergleich 2012. Mathematische und naturwissenschaftliche Kompetenzen am Ende der Sekundarstufe I*. Münster: Waxmann.
- Stanat, P., Böhme, K., Schipolowski, S. & Haag, N. (Hrsg.). (2016). *IQB-Bildungstrend 2015. Sprachliche Kompetenzen am Ende der 9. Jahrgangsstufe im zweiten Ländervergleich*. Münster: Waxmann. Verfügbar unter <https://www.iqb.hu-berlin.de/bt/BT2015/Bericht>
- Stanat, P., Schipolowski, S., Mahler, N., Weirich, S. & Henschel, S. (Hrsg.). (2019). *IQB-Bildungstrend 2018. Mathematische und naturwissenschaftliche Kompetenzen am Ende der Sekundarstufe I im zweiten Ländervergleich*. Münster: Waxmann.

**Tabelle ESM.2.** Korrelationen der fachbezogenen Selbstkonzepte, Interessen, Testleistungen und Noten nach Fach, Erhebungszeitpunkt (T1, T2) und Geschlecht (Mädchen oberhalb der Diagonale, Jungen unterhalb der Diagonale)

| Variable          | T1  |      |     |      | T2  |     |     |      |
|-------------------|-----|------|-----|------|-----|-----|-----|------|
|                   | SK  | Int  | PV  | Note | SK  | Int | PV  | Note |
| <b>Mathematik</b> |     |      |     |      |     |     |     |      |
| SK                | --  | .66  | .33 | .58  | --  | .63 | .15 | .48  |
| Int               | .65 | --   | .19 | .40  | .63 | --  | .07 | .33  |
| PV                | .30 | .18  | --  | .44  | .17 | .08 | --  | .19  |
| Note              | .59 | .41  | .37 | --   | .51 | .35 | .20 | --   |
| <b>Physik</b>     |     |      |     |      |     |     |     |      |
| SK                | --  | .61  | .15 | .40  | --  | .62 | .10 | .41  |
| Int               | .61 | --   | .11 | .26  | .61 | --  | .05 | .27  |
| PV                | .04 | -.01 | --  | .21  | .08 | .04 | --  | .18  |
| Note              | .40 | .26  | .17 | --   | .40 | .26 | .18 | --   |
| <b>Chemie</b>     |     |      |     |      |     |     |     |      |
| SK                | --  | .61  | .09 | .44  | --  | .61 | .07 | .45  |
| Int               | .60 | --   | .07 | .29  | .60 | --  | .05 | .29  |
| PV                | .04 | .02  | --  | .17  | .06 | .04 | --  | .18  |
| Note              | .44 | .29  | .17 | --   | .43 | .29 | .17 | --   |
| <b>Biologie</b>   |     |      |     |      |     |     |     |      |
| SK                | --  | .57  | .17 | .38  | --  | .57 | .17 | .39  |
| Int               | .56 | --   | .11 | .23  | .57 | --  | .11 | .23  |
| PV                | .16 | .11  | --  | .21  | .16 | .11 | --  | .21  |
| Note              | .39 | .23  | .21 | --   | .39 | .23 | .21 | --   |
| <b>Deutsch</b>    |     |      |     |      |     |     |     |      |
| SK                | --  | --   | .25 | .44  | --  | --  | .27 | .41  |
| PV                | .23 | --   | --  | .39  | .24 | --  | --  | .43  |
| Note              | .43 | --   | .33 | --   | .38 | --  | .37 | --   |

*Anmerkungen:* Für alle Korrelationen  $r \geq .02$  gilt  $p < .05$ . Erhebungszeitpunkt T1/T2 für Mathematik und Naturwissenschaften: 2012/2018; Erhebungszeitpunkt T1/T2 für Deutsch: 2009/2015. Bei den schulfachbezogenen Noten entsprechen höhere numerische Werte besseren Leistungen (1 [*ungenügend* oder *mangelhaft*] bis 5 [*sehr gut*]).

**Tabelle ESM2.3.** Manifeste Mittelwerte (*M*), Standardfehler (*SE*) und Standardabweichungen (*SD*) der fachbezogene Selbstkonzepte und Interessen, Testleistung und umgepolte Noten getrennt für Mädchen und Jungen sowie für die Erhebungszeitpunkte, ergänzt um die Differenz der Mittelwerte zwischen den Erhebungszeitpunkten ( $\Delta M$ ) mit dazugehörigem Standardfehler und der Effektstärke Cohens *d*

| Variable          | Geschlecht | T1       |               |           | T2       |               |           | Differenz T2-T1 |               |              |
|-------------------|------------|----------|---------------|-----------|----------|---------------|-----------|-----------------|---------------|--------------|
|                   |            | <i>M</i> | ( <i>SE</i> ) | <i>SD</i> | <i>M</i> | ( <i>SE</i> ) | <i>SD</i> | $\Delta M$      | ( <i>SE</i> ) | <i>d</i>     |
| <b>Mathematik</b> |            |          |               |           |          |               |           |                 |               |              |
| Selbstkonzept     | Mädchen    | 2.41     | (0.02)        | 0.86      | 2.46     | (0.01)        | 0.82      | <b>0.05</b>     | (0.02)        | <b>0.06</b>  |
|                   | Jungen     | 2.85     | (0.02)        | 0.84      | 2.72     | (0.01)        | 0.81      | <b>-0.13</b>    | (0.02)        | <b>-0.16</b> |
| Interesse         | Mädchen    | 2.29     | (0.02)        | 0.82      | 2.25     | (0.01)        | 0.78      | -0.04           | (0.02)        | -0.05        |
|                   | Jungen     | 2.66     | (0.02)        | 0.84      | 2.40     | (0.01)        | 0.80      | <b>-0.26</b>    | (0.03)        | <b>-0.31</b> |
| Testleistung      | Mädchen    | 491.88   | (2.08)        | 99.26     | 494.77   | (1.61)        | 95.56     | 2.89            | (2.63)        | 0.03         |
|                   | Jungen     | 507.84   | (2.07)        | 100.10    | 502.07   | (1.49)        | 99.56     | <b>-5.76</b>    | (2.55)        | <b>-0.06</b> |
| Note              | Mädchen    | 2.86     | (0.02)        | 1.04      | 2.94     | (0.02)        | 1.07      | <b>0.09</b>     | (0.03)        | <b>0.08</b>  |
|                   | Jungen     | 2.84     | (0.02)        | 1.02      | 2.84     | (0.02)        | 1.06      | -0.01           | (0.03)        | -0.01        |
| <b>Physik</b>     |            |          |               |           |          |               |           |                 |               |              |
| Selbstkonzept     | Mädchen    | 2.31     | (0.02)        | 0.72      | 2.34     | (0.01)        | 0.72      | 0.03            | (0.02)        | 0.04         |
|                   | Jungen     | 2.75     | (0.02)        | 0.75      | 2.63     | (0.01)        | 0.73      | <b>-0.11</b>    | (0.02)        | <b>-0.15</b> |
| Interesse         | Mädchen    | 1.95     | (0.02)        | 0.75      | 2.00     | (0.02)        | 0.76      | <b>0.05</b>     | (0.02)        | <b>0.07</b>  |
|                   | Jungen     | 2.48     | (0.02)        | 0.84      | 2.37     | (0.01)        | 0.83      | <b>-0.11</b>    | (0.02)        | <b>-0.13</b> |
| Testleistung      | Mädchen    | 499.85   | (1.82)        | 97.01     | 498.16   | (1.58)        | 93.08     | -1.70           | (2.41)        | -0.02        |
|                   | Jungen     | 500.14   | (2.90)        | 102.77    | 496.42   | (1.80)        | 97.77     | -3.73           | (3.42)        | -0.04        |
| Note              | Mädchen    | 3.00     | (0.02)        | 0.98      | 3.09     | (0.02)        | 0.98      | <b>0.10</b>     | (0.03)        | <b>0.10</b>  |
|                   | Jungen     | 3.02     | (0.03)        | 0.98      | 2.98     | (0.02)        | 1.00      | -0.04           | (0.03)        | -0.04        |
| <b>Chemie</b>     |            |          |               |           |          |               |           |                 |               |              |
| Selbstkonzept     | Mädchen    | 2.48     | (0.02)        | 0.77      | 2.46     | (0.01)        | 0.76      | -0.02           | (0.02)        | -0.03        |
|                   | Jungen     | 2.66     | (0.02)        | 0.79      | 2.58     | (0.01)        | 0.76      | <b>-0.08</b>    | (0.02)        | <b>-0.10</b> |
| Interesse         | Mädchen    | 2.17     | (0.02)        | 0.82      | 2.18     | (0.01)        | 0.81      | 0.02            | (0.02)        | 0.02         |
|                   | Jungen     | 2.39     | (0.02)        | 0.86      | 2.32     | (0.01)        | 0.84      | <b>-0.07</b>    | (0.02)        | <b>-0.08</b> |
| Testleistung      | Mädchen    | 504.08   | (1.71)        | 95.78     | 499.46   | (1.55)        | 93.52     | <b>-4.63</b>    | (2.31)        | <b>-0.05</b> |
|                   | Jungen     | 496.12   | (2.70)        | 103.71    | 489.04   | (1.74)        | 98.13     | <b>-7.08</b>    | (3.21)        | <b>-0.07</b> |

|                 |         |        |        |        |        |        |       |              |        |              |
|-----------------|---------|--------|--------|--------|--------|--------|-------|--------------|--------|--------------|
| Note            | Mädchen | 3.03   | (0.02) | 0.99   | 3.17   | (0.02) | 1.00  | <b>0.14</b>  | (0.03) | <b>0.14</b>  |
|                 | Jungen  | 2.97   | (0.02) | 1.01   | 2.97   | (0.02) | 1.01  | 0.01         | (0.03) | 0.01         |
| <b>Biologie</b> |         |        |        |        |        |        |       |              |        |              |
| Selbstkonzept   | Mädchen | 2.83   | (0.02) | 0.66   | 2.81   | (0.01) | 0.67  | -0.02        | (0.02) | -0.03        |
|                 | Jungen  | 2.81   | (0.01) | 0.67   | 2.71   | (0.01) | 0.69  | <b>-0.09</b> | (0.02) | <b>-0.14</b> |
| Interesse       | Mädchen | 2.53   | (0.02) | 0.79   | 2.57   | (0.01) | 0.77  | <b>0.05</b>  | (0.02) | <b>0.06</b>  |
|                 | Jungen  | 2.48   | (0.02) | 0.80   | 2.37   | (0.01) | 0.78  | <b>-0.10</b> | (0.02) | <b>-0.13</b> |
| Testleistung    | Mädchen | 511.10 | (1.78) | 96.41  | 509.05 | (1.65) | 94.03 | -2.06        | (2.43) | -0.02        |
|                 | Jungen  | 489.46 | (2.40) | 102.19 | 486.13 | (1.74) | 97.67 | -3.33        | (2.97) | -0.03        |
| Note            | Mädchen | 3.21   | (0.02) | 0.92   | 3.27   | (0.02) | 0.96  | 0.06         | (0.03) | 0.06         |
|                 | Jungen  | 3.05   | (0.02) | 0.94   | 3.01   | (0.02) | 0.98  | -0.04        | (0.03) | -0.05        |
| <b>Deutsch</b>  |         |        |        |        |        |        |       |              |        |              |
| Selbstkonzept   | Mädchen | 3.32   | (0.01) | 0.57   | 3.36   | (0.01) | 0.54  | <b>0.04</b>  | (0.01) | <b>0.07</b>  |
|                 | Jungen  | 3.14   | (0.01) | 0.61   | 3.18   | (0.01) | 0.60  | <b>0.04</b>  | (0.02) | <b>0.06</b>  |
| Testleistung    | Mädchen | 522.63 | (1.80) | 94.86  | 518.71 | (1.54) | 96.88 | -3.92        | (2.37) | -0.04        |
|                 | Jungen  | 486.79 | (1.62) | 101.08 | 482.52 | (1.58) | 99.93 | -4.27        | (2.26) | -0.04        |
| Note            | Mädchen | 3.12   | (0.02) | 0.83   | 3.22   | (0.01) | 0.85  | <b>0.10</b>  | (0.02) | <b>0.12</b>  |
|                 | Jungen  | 2.70   | (0.01) | 0.82   | 2.77   | (0.01) | 0.83  | <b>0.08</b>  | (0.02) | <b>0.10</b>  |

*Anmerkungen:* \* $p < .05$ ; In der Tabelle werden gerundete Werte angegeben. Dadurch kann die Differenz der Mittelwerte minimal von der dargestellten Differenz  $\Delta M$  abweichen. Erhebungszeitpunkt T1/T2 für Mathematik und Naturwissenschaften: 2012/2018; Erhebungszeitpunkt T1/T2 für Deutsch: 2009/2015. Fett gedruckte Differenzen sind statistisch signifikant ( $p < .05$ ). Bei den schulfachbezogenen Noten wurden entsprechen höhere numerische Werte besseren Leistungen (1 [*ungenügend* oder *mangelhaft*] bis 5 [*sehr gut*]).
