# Supplementary material for: Kohortentrends in schulfachbezogenen Selbstkonzepten und Interessen bei Mädchen und Jungen
Source: Atypon-hosted journal article supplement (doi:10.1024/1010-0652/a000346), 2022-04-19
Supplement: 1010-0652_a000346_esm3.pdf [file 1010-0652_a000346_esm3.pdf]

**A Selbstkonzept- und Interessenswerte für Mädchen und Jungen pro Notenstufe nach Erhebungszeitpunkt**

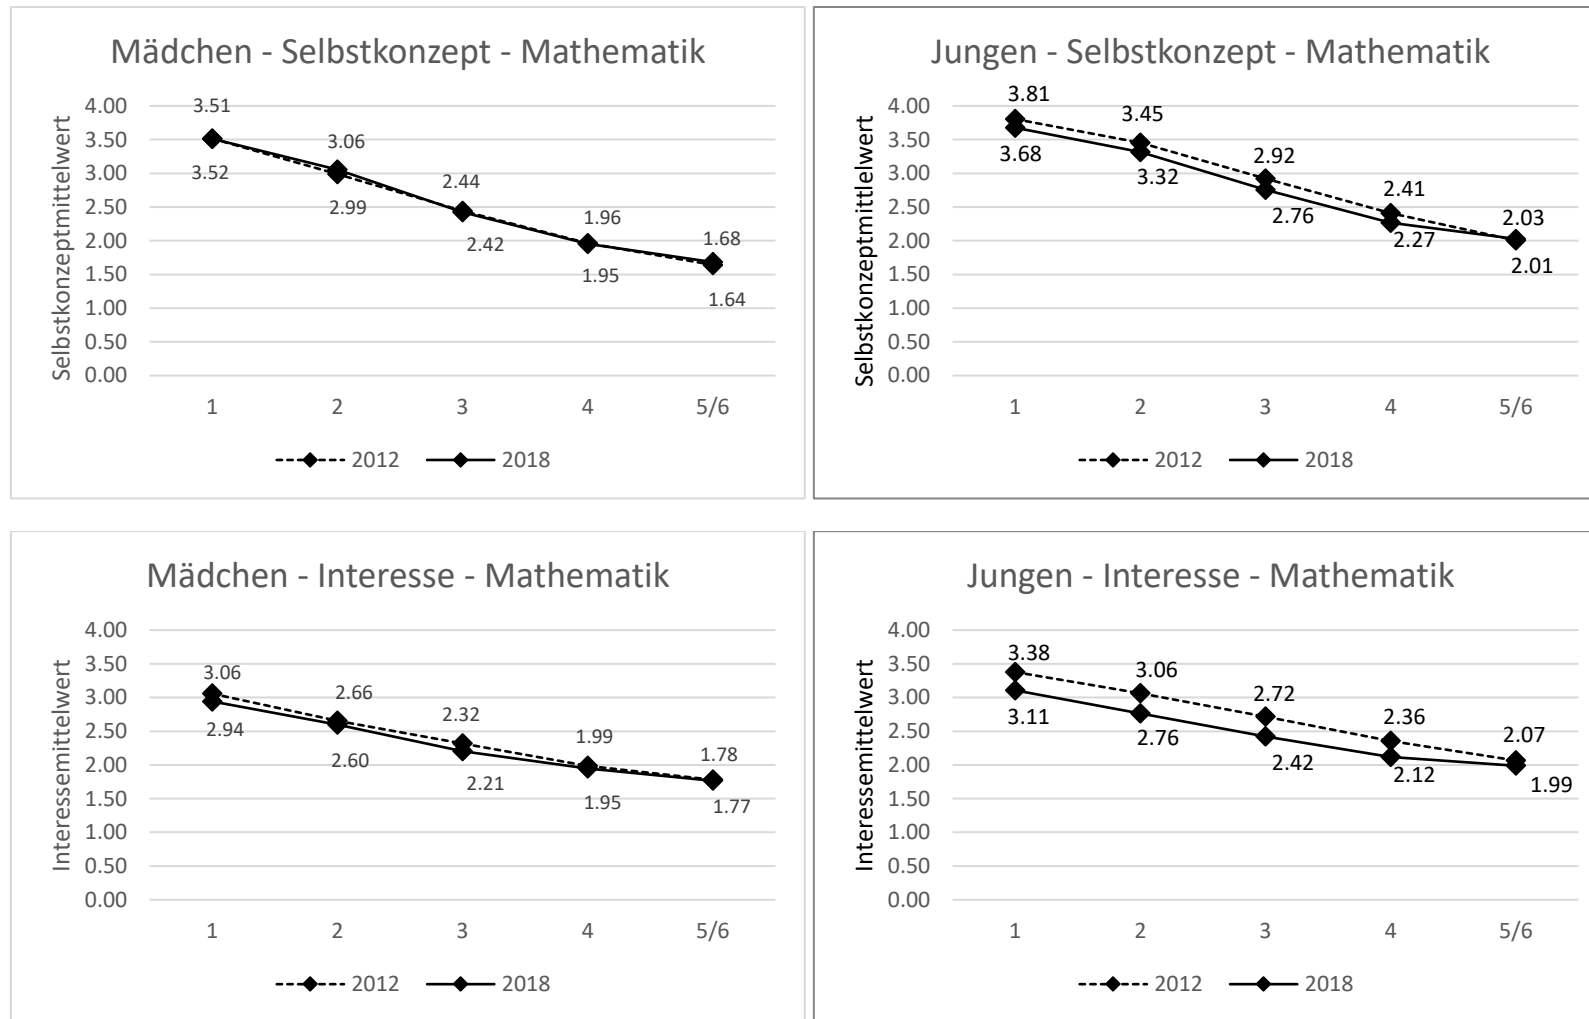

Abbildung ESM3.1. Selbstkonzept- und Interessensmittelwerte in Mathematik pro Notenstufe getrennt für Mädchen und Jungen nach Erhebungszeitpunkt. Niedrigere Notenwerte entsprechen besseren schulischen Leistungen. Die Schulnoten 5 und 6 wurden zusammengefasst.

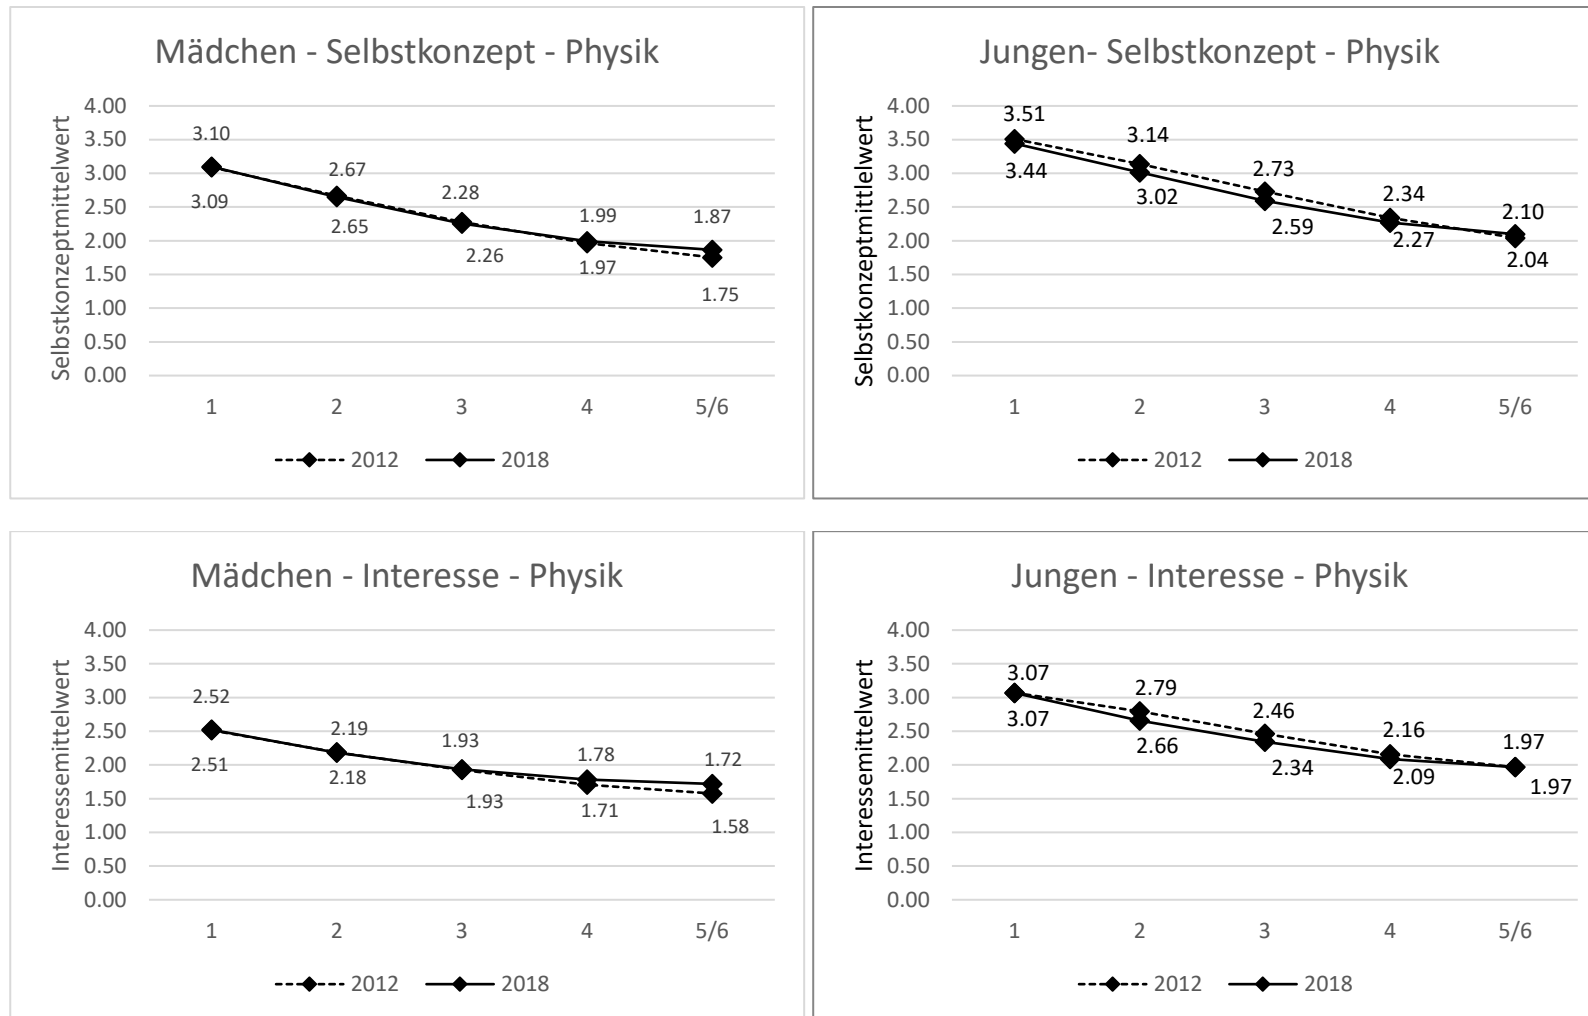

Abbildung ESM3.2. Selbstkonzept- und Interessensmittelwerte in Physik pro Notenstufe getrennt für Mädchen und Jungen nach Erhebungszeitpunkt. Niedrigere Notenwerte entsprechen besseren schulischen Leistungen. Die Schulnoten 5 und 6 wurden zusammengefasst.

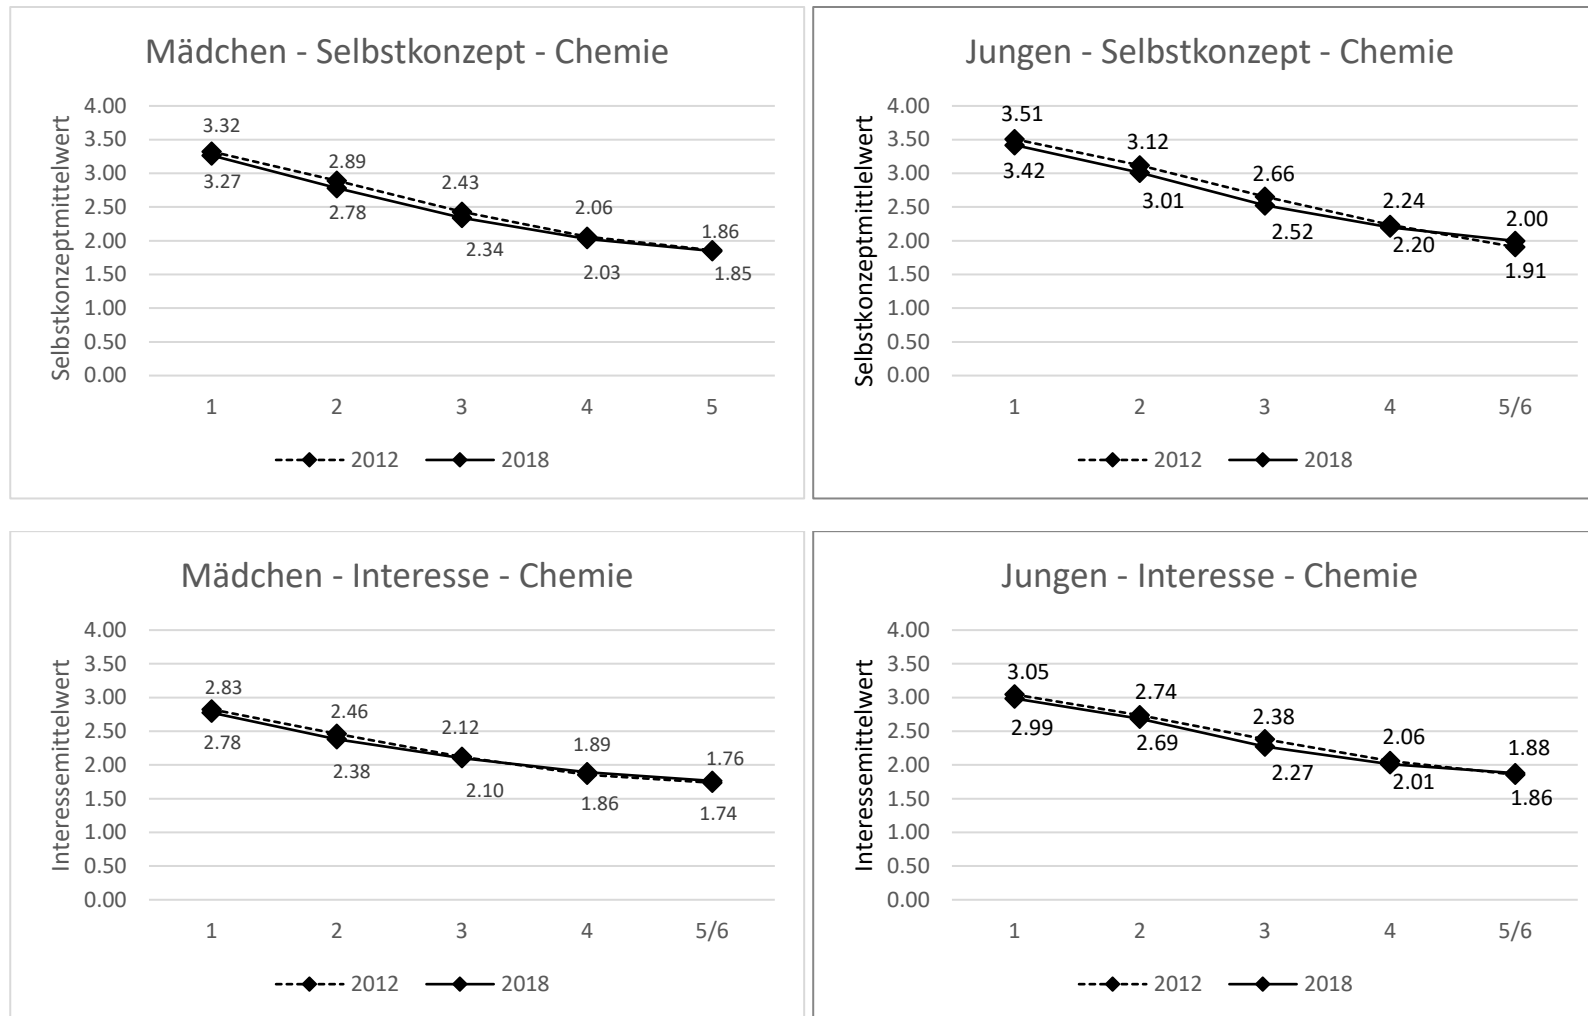

Abbildung ESM3.3. Selbstkonzept- und Interessensmittelwerte in Chemie pro Notenstufe getrennt für Mädchen und Jungen nach Erhebungszeitpunkt. Niedrigere Notenwerte entsprechen besseren schulischen Leistungen. Die Schulnoten 5 und 6 wurden zusammengefasst.

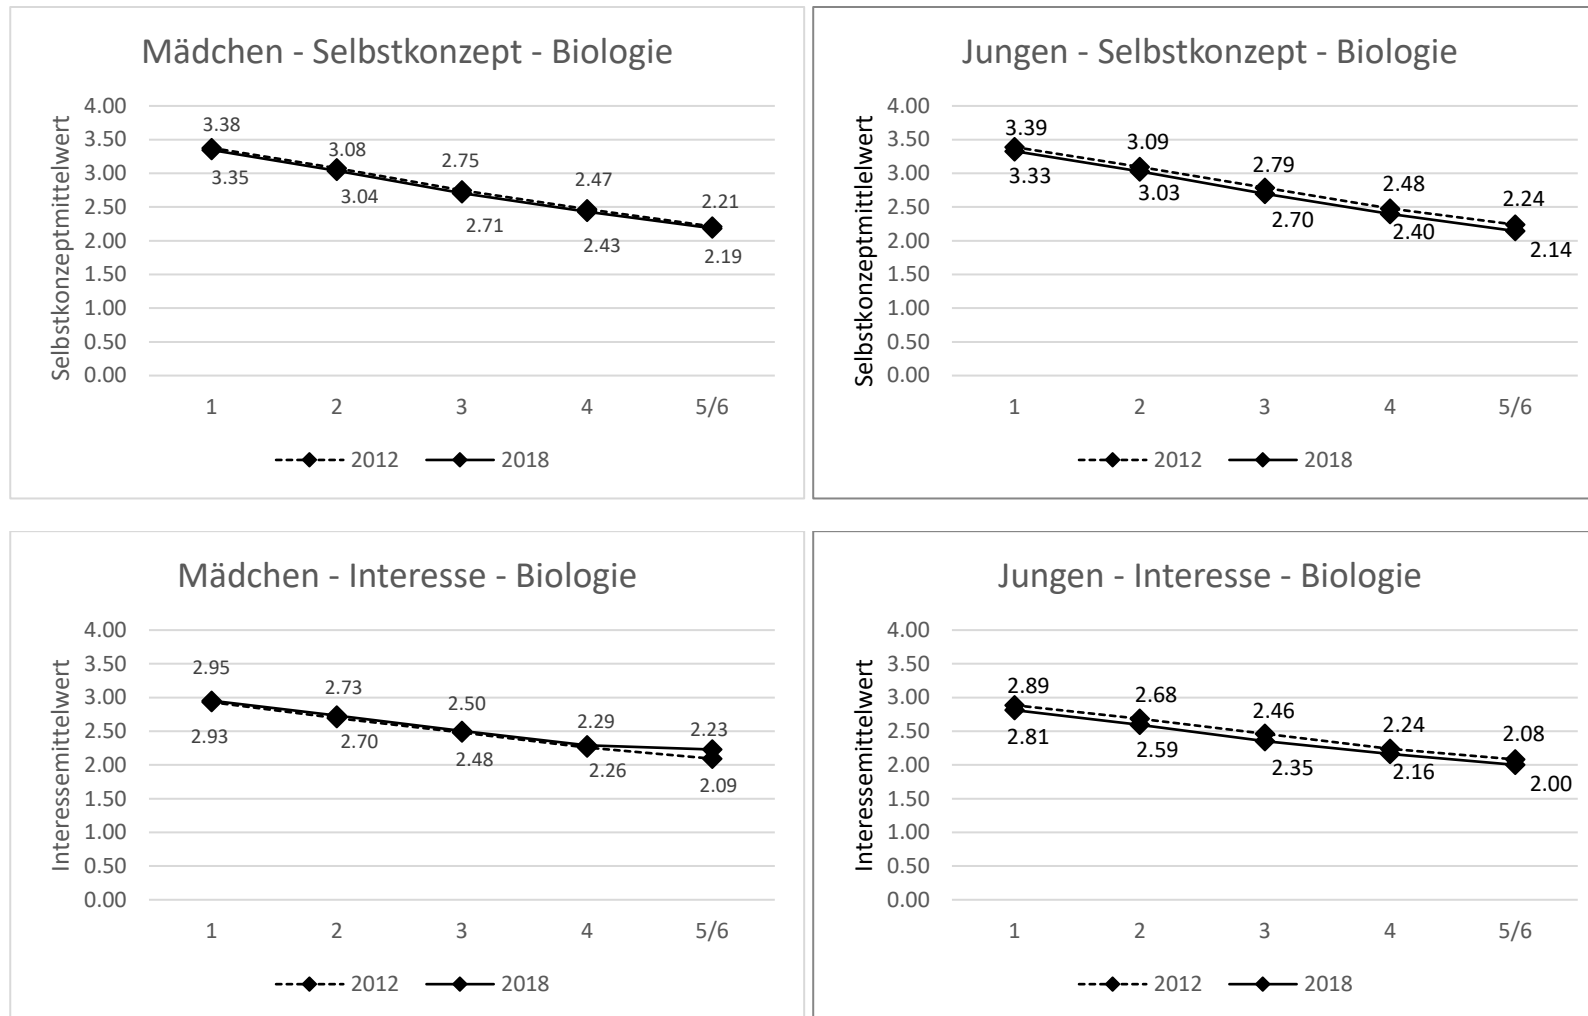

Abbildung ESM3.4. Selbstkonzept- und Interessensmittelwerte in Biologie pro Notenstufe getrennt für Mädchen und Jungen nach Erhebungszeitpunkt. Niedrigere Notenwerte entsprechen besseren schulischen Leistungen. Die Schulnoten 5 und 6 wurden zusammengefasst.

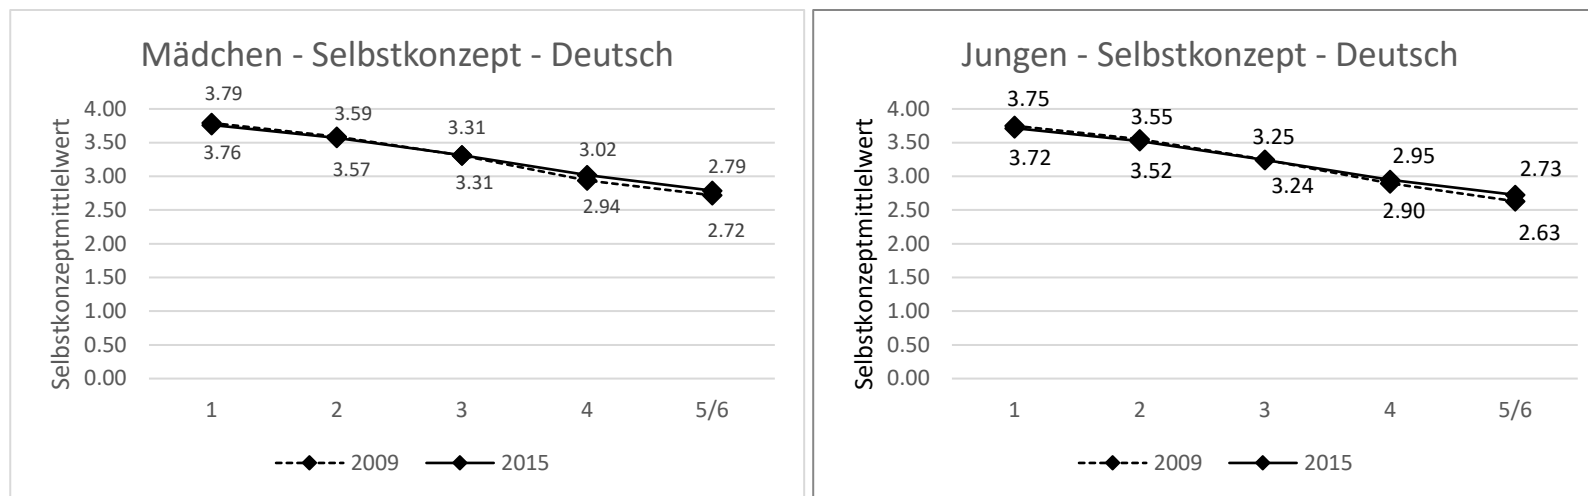

Abbildung ESM3.5. Selbstkonzeptmittelwerte in Deutsch pro Notenstufe getrennt für Mädchen und Jungen nach Erhebungszeitpunkt. Niedrigere Notenwerte entsprechen besseren schulischen Leistungen. Die Schulnoten 5 und 6 wurden zusammengefasst.

### B Selbstkonzept- und Interessenswerte für Mädchen und Jungen pro Kompetenzstufe nach Erhebungszeitpunkt

Zur inhaltlichen Interpretation der von den Schülerinnen und Schülern erreichten Testleistungen im IQB-Bildungstrend dienen Kompetenzstufenmodelle, anhand derer sich beschreiben lässt, welche Anforderungen Schülerinnen und Schüler, die ein bestimmtes Testergebnis erzielt haben, bewältigen können. Ferner kann damit festgestellt werden, inwieweit die Kompetenzen der Jugendlichen im jeweiligen Fach und Kompetenzbereich den Zielen entsprechen, die mit den Bildungsstandards und den Kompetenzstufenmodellen festgelegt sind (I = unter Mindeststandard, II = Mindeststandard, III = Regelstandard, IV = Regelstandard Plus, V = Optimalstandard; vgl. Stanat, Schipolowski, Mahler, Weirich & Henschel, 2019). Für die im Folgenden dargestellten Analysen verwendeten wir die Globalskala mathematischer Kompetenz, in den naturwissenschaftlichen Fächern nutzten wir die Kompetenzskalen für das *Fachwissen* (siehe Absatz 2.2 im Manuskript). Für das Fach Deutsch gibt es kein Kompetenzstufenmodell für die von uns für den vorliegenden Beitrag gebildete Globalskala; eine Darstellung der Selbstkonzeptwerte für Mädchen und Jungen je Kompetenzstufe nach Erhebungszeitpunkten ist demnach für das Fach Deutsch nicht möglich.

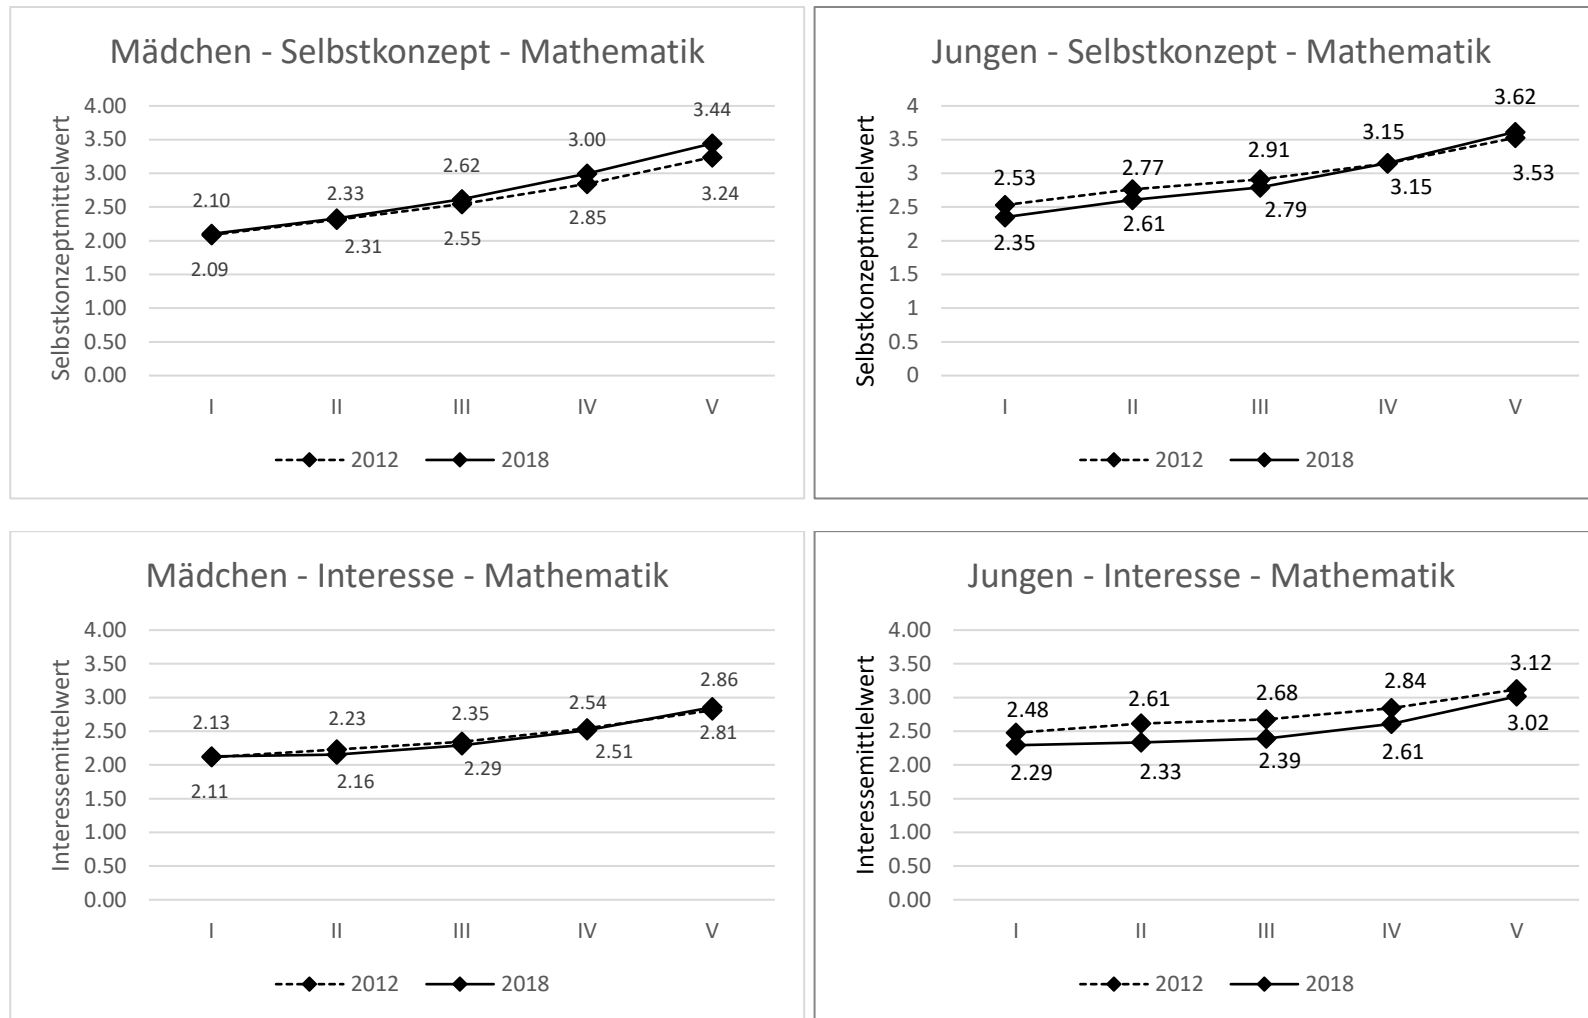

Abbildung ESM3.6. Selbstkonzept- und Interessensmittelwerte in Mathematik pro Kompetenzstufe getrennt für Mädchen und Jungen nach Erhebungszeitpunkt. Niedrigere Kompetenzstufen entsprechen schlechteren Testleistungswerten.

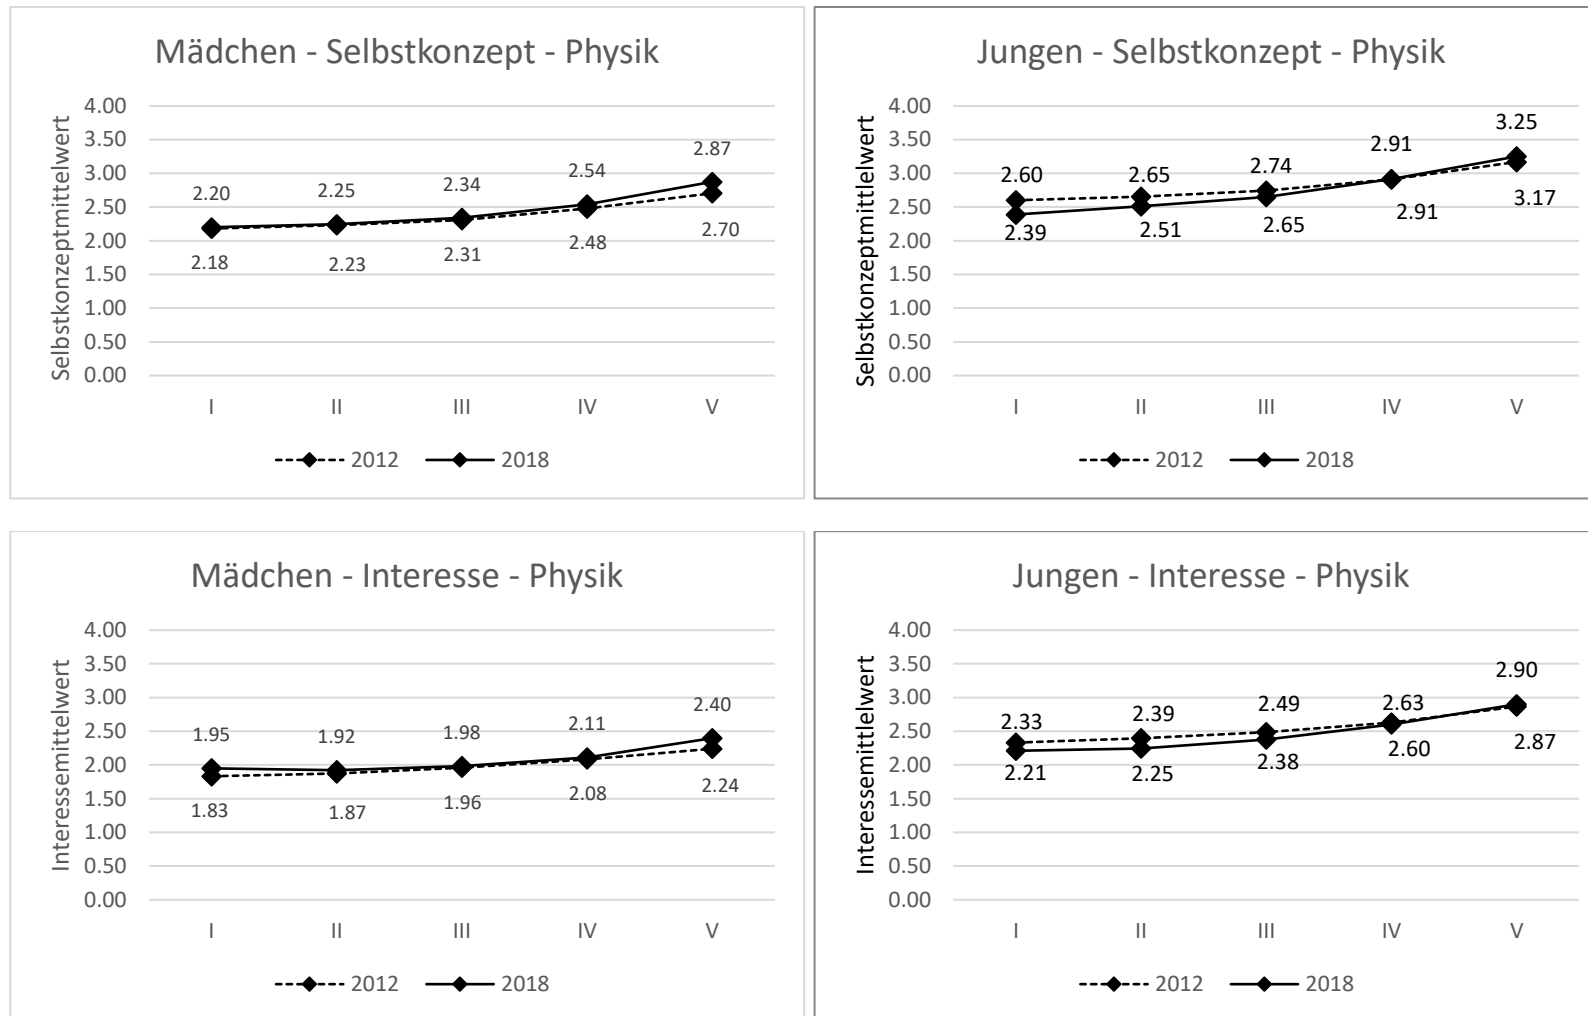

Abbildung ESM3.7. Selbstkonzept- und Interessensmittelwerte in Physik pro Kompetenzstufe getrennt für Mädchen und Jungen nach Erhebungszeitpunkt. Niedrigere Kompetenzstufen entsprechen schlechteren Testleistungswerten.

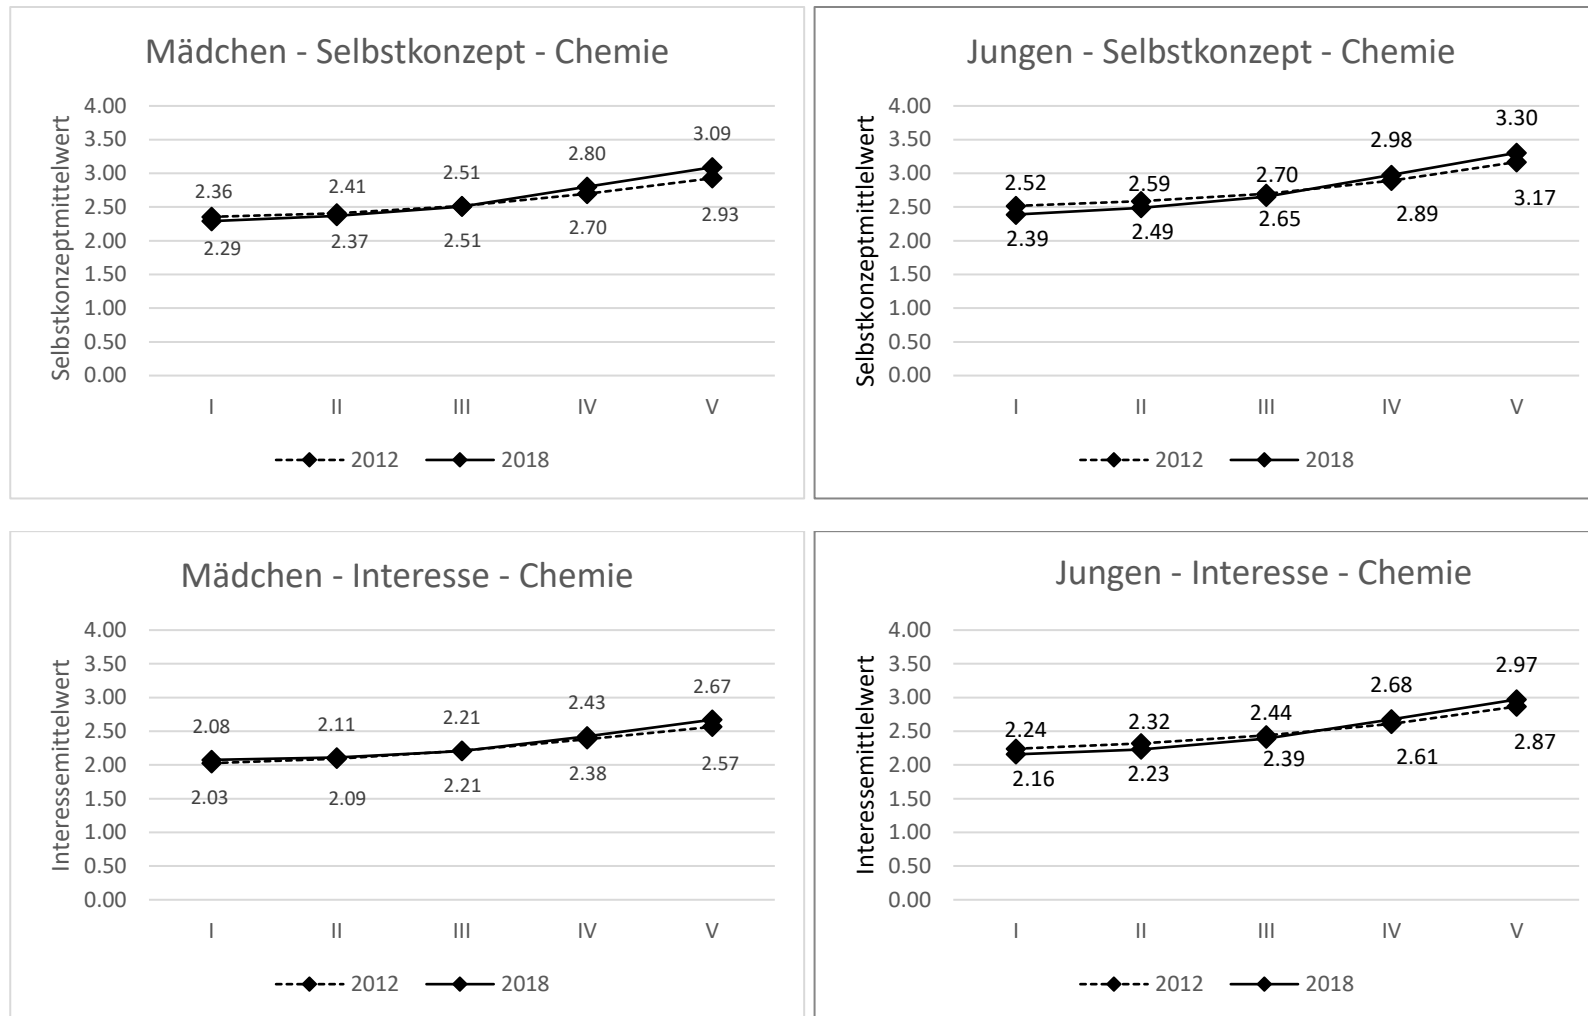

Abbildung ESM3.8. Selbstkonzept- und Interessensmittelwerte in Chemie pro Kompetenzstufe getrennt für Mädchen und Jungen nach Erhebungszeitpunkt. Niedrigere Kompetenzstufen entsprechen schlechteren Testleistungswerten.



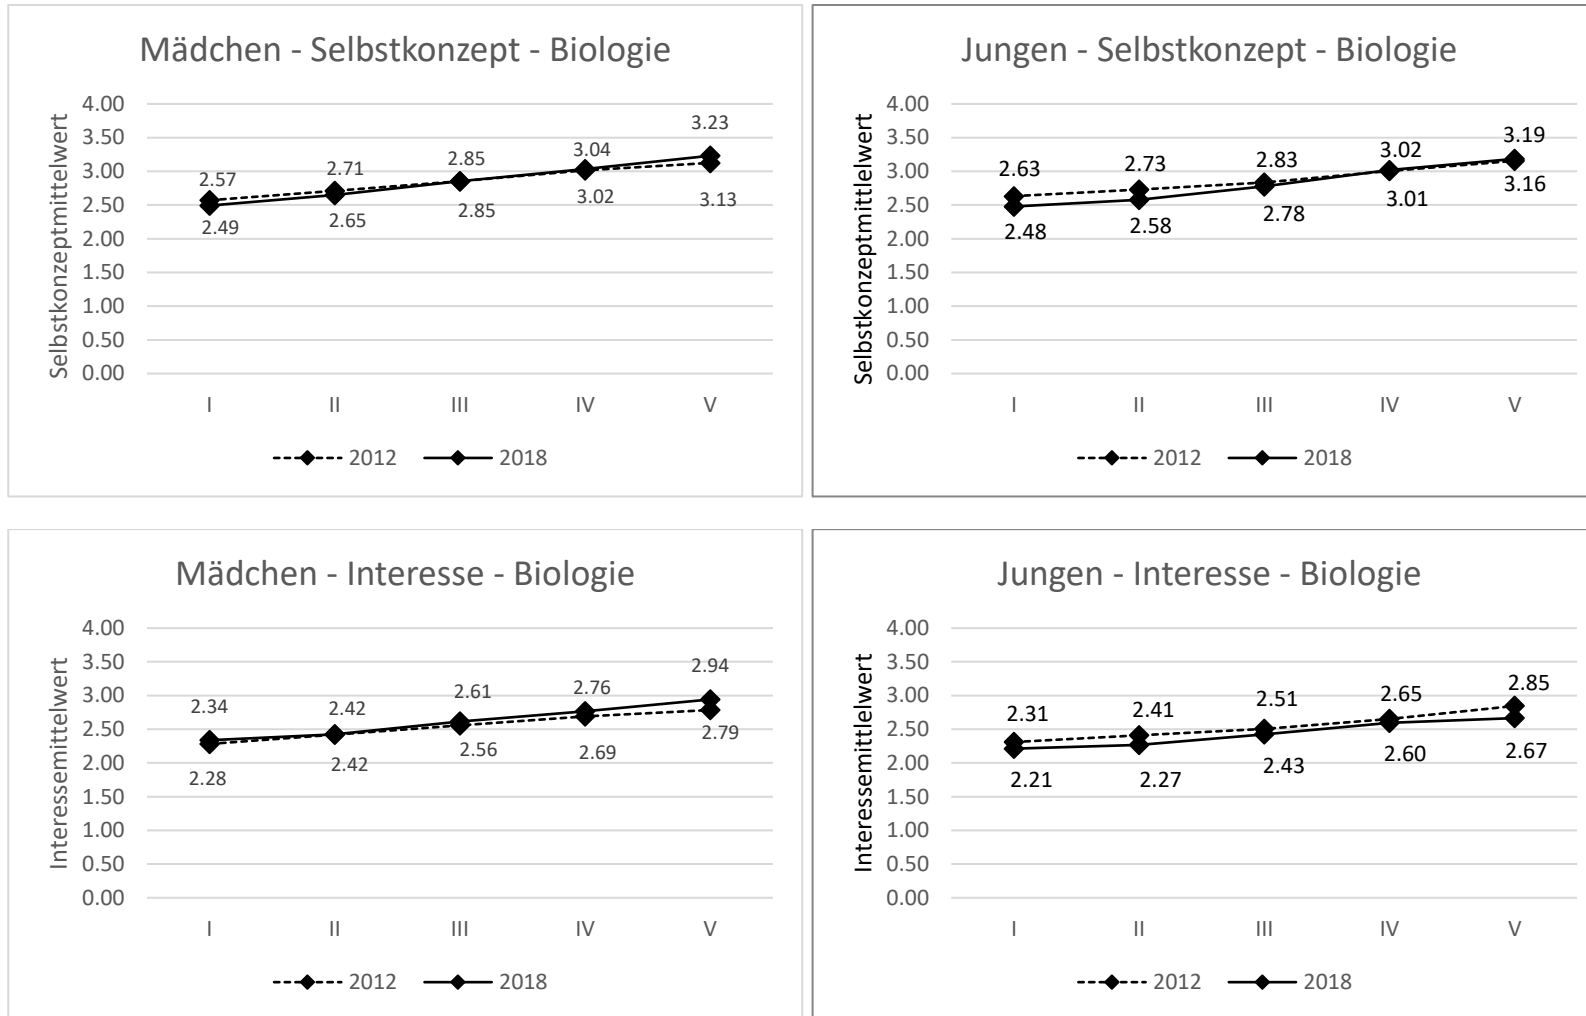

Abbildung ESM3.9. Selbstkonzept- und Interessensmittelwerte in Biologie pro Kompetenzstufe getrennt für Mädchen und Jungen nach Erhebungszeitpunkt. Niedrigere Kompetenzstufen entsprechen schlechteren Testleistungswerten.
