# Supplementary material for: Kohortentrends in schulfachbezogenen Selbstkonzepten und Interessen bei Mädchen und Jungen
Source: Atypon-hosted journal article supplement (doi:10.1024/1010-0652/a000346), 2022-04-19
Supplement: 1010-0652_a000346_esm4.pdf [file 1010-0652_a000346_esm4.pdf]

Um die Robustheit der im Manuskript vorgestellten Analysen zu überprüfen, haben wir eine Reihe zusätzlicher Regressionsanalysen durchgeführt. Die vollständigen Ergebnisse sind im vorliegenden Elektronischen Supplement enthalten: (Tab. 1) Berücksichtigung der Dreifach-Interaktionen aus Geschlecht\*Erhebungszeitpunkt\*Testleistung bzw.

Geschlecht\*Erhebungszeitpunkt\*Noten, um auch mögliche Geschlechterunterschiede in den Kohortentrends der Testleistungen bzw. Noten zu berücksichtigen; (Tab. 2) getrennte Analysen nach Schulart (Gymnasium, nichtgymnasiale Schulen) sowie (Tab. 3) getrennte Analysen nach Ländergruppe (ostdeutsche Länder, westdeutsche Länder, Stadtstaaten), da sich die Leistungstrends allgemein (Schipolowski et al., 2019) und auch geschlechtsspezifisch (Gentrup & Stanat, 2021) in Abhängigkeit dieser kontextuellen Merkmale unterscheiden; und (Tab. 4) getrennte Analysen in Abhängigkeit von Schulstrukturen (Länder mit (etabliert) zwei- oder dreigliedrigem Schulsystem, Reformländer), da einzelne Bundesländer in den vergangenen Jahren Haupt- und Realschulen durch Gesamtschulen bzw. Schulen mit mehreren Bildungsgängen ersetzt haben, was die Zusammensetzung der Schülerschaft verändert hat (z. B. Lenz et al., 2019) und sich aufgrund einer damit verbundenen Änderung der leistungsbezogenen Referenzgruppe im Selbstkonzept der Schülerinnen und Schüler niederschlagen könnte.

Gentrup, S. & Stanat, P. (2021). *Jungen als neue Bildungsverlierer? – Zusatzauswertungen des IQB-Ländervergleichs 2012 und des IQB-Bildungstrends 2018 (JuBiv). Schlussbericht*. Humboldt-Universität zu Berlin.

Lenz, S., Holtmann, M., Rjosk, C. & Stanat, P. (2019). Soziokulturelle Segregation an weiterführenden Schulen—Analysen zur Rolle der Gliederung des deutschen Schulsystems und schulstruktureller Reformmaßnahmen. *Zeitschrift für Erziehungswissenschaft*, 22 (6), 1333–1358.

Schipolowski, S., Wittig, J., Mahler, N. & Stanat, P. (2019). Geschlechtsspezifische Disparitäten. In P. Stanat, S. Schipolowski, N. Mahler, S. Weirich & S. Henschel (Hrsg.), *IQB-Bildungstrend 2018* (S. 237–263). Münster: Waxmann.

**Tabelle ESM4.1**

Ergebnisse der Regressionsanalysen ohne Kontrolle von Leistung (M0), unter Kontrolle der Testleistung (M1), der Noten (M2) und beider Leistungsmaße (M3) sowie unter Berücksichtigung der Dreifachinteraktionen aus Geschlecht\*Erhebungszeitpunkt\*Testleistung bzw.

Geschlecht\*Erhebungszeitpunkt\*Noten – separat für die Selbstkonzepte und Interessen in Mathematik, Physik, Chemie, Biologie und Deutsch

|                       | Selbstkonzept       |                     |                     |                     | Interesse           |                     |                     |                     |
|-----------------------|---------------------|---------------------|---------------------|---------------------|---------------------|---------------------|---------------------|---------------------|
|                       | M0                  | M1                  | M2                  | M3                  | M0                  | M1                  | M2                  | M3                  |
|                       | <i>b</i> (SE)       |
| <b>Mathematik</b>     |                     |                     |                     |                     |                     |                     |                     |                     |
| Intercept             | <b>2.85</b> (0.05)  | <b>2.81</b> (0.02)  | <b>2.86</b> (0.02)  | <b>2.84</b> (0.02)  | <b>2.66</b> (0.04)  | <b>2.64</b> (0.03)  | <b>2.67</b> (0.03)  | <b>2.65</b> (0.03)  |
| Geschlecht            | <b>-0.44</b> (0.03) | <b>-0.40</b> (0.02) | <b>-0.45</b> (0.02) | <b>-0.44</b> (0.02) | <b>-0.37</b> (0.03) | <b>-0.35</b> (0.03) | <b>-0.38</b> (0.03) | <b>-0.38</b> (0.03) |
| EZ                    | -0.13 (0.07)        | <b>-0.13</b> (0.02) | <b>-0.13</b> (0.02) | <b>-0.14</b> (0.02) | <b>-0.26</b> (0.07) | <b>-0.25</b> (0.04) | <b>-0.26</b> (0.04) | <b>-0.26</b> (0.04) |
| PV                    |                     | <b>0.24</b> (0.02)  |                     | <b>0.07</b> (0.02)  |                     | <b>0.15</b> (0.02)  |                     | 0.02 (0.02)         |
| Note                  |                     |                     | <b>0.51</b> (0.01)  | <b>0.47</b> (0.02)  |                     |                     | <b>0.36</b> (0.02)  | <b>0.34</b> (0.02)  |
| Geschlecht*EZ         | <b>0.19</b> (0.03)  | <b>0.17</b> (0.03)  | <b>0.14</b> (0.02)  | <b>0.15</b> (0.03)  | <b>0.22</b> (0.04)  | <b>0.20</b> (0.04)  | <b>0.19</b> (0.03)  | <b>0.19</b> (0.03)  |
| Geschlecht*PV         |                     | 0.03 (0.02)         |                     | 0.00 (0.03)         |                     | 0.01 (0.03)         |                     | -0.01 (0.03)        |
| Geschlecht*Note       |                     |                     | 0.00 (0.02)         | 0.00 (0.02)         |                     |                     | -0.02 (0.02)        | -0.01 (0.03)        |
| EZ*PV                 |                     | <b>0.06</b> (0.02)  |                     | <b>0.06</b> (0.02)  |                     | -0.01 (0.02)        |                     | 0.00 (0.03)         |
| EZ*Note               |                     |                     | -0.03 (0.02)        | <b>-0.05</b> (0.02) |                     |                     | <b>-0.05</b> (0.02) | <b>-0.05</b> (0.02) |
| PV*Note               |                     |                     |                     | <b>0.03</b> (0.01)  |                     |                     |                     | <b>0.03</b> (0.01)  |
| Geschlecht*EZ*PV      |                     | -0.01 (0.03)        |                     | -0.04 (0.03)        |                     | 0.00 (0.03)         |                     | -0.02 (0.04)        |
| Geschlecht*EZ*Note    |                     |                     | 0.04 (0.03)         | 0.06 (0.03)         |                     |                     | 0.04 (0.03)         | 0.04 (0.03)         |
| <i>R</i> <sup>2</sup> | 0.05                | 0.17                | 0.40                | 0.41                | 0.04                | 0.07                | 0.20                | 0.20                |
| <b>Physik</b>         |                     |                     |                     |                     |                     |                     |                     |                     |
| Intercept             | <b>2.75</b> (0.03)  | <b>2.74</b> (0.02)  | <b>2.74</b> (0.02)  | <b>2.73</b> (0.02)  | <b>2.48</b> (0.02)  | <b>2.48</b> (0.02)  | <b>2.47</b> (0.02)  | <b>2.46</b> (0.02)  |
| Geschlecht            | <b>-0.44</b> (0.02) | <b>-0.43</b> (0.02) | <b>-0.42</b> (0.02) | <b>-0.43</b> (0.02) | <b>-0.53</b> (0.02) | <b>-0.53</b> (0.02) | <b>-0.53</b> (0.02) | <b>-0.53</b> (0.02) |
| EZ                    | <b>-0.11</b> (0.04) | <b>-0.11</b> (0.02) | <b>-0.10</b> (0.02) | <b>-0.10</b> (0.02) | <b>-0.11</b> (0.03) | <b>-0.10</b> (0.02) | <b>-0.10</b> (0.02) | <b>-0.10</b> (0.02) |
| PV                    |                     | <b>0.13</b> (0.02)  |                     | <b>0.04</b> (0.02)  |                     | <b>0.13</b> (0.02)  |                     | <b>0.05</b> (0.02)  |
| Note                  |                     |                     | <b>0.39</b> (0.02)  | <b>0.37</b> (0.02)  |                     |                     | <b>0.30</b> (0.02)  | <b>0.28</b> (0.02)  |
| Geschlecht*EZ         | <b>0.15</b> (0.02)  | <b>0.14</b> (0.02)  | <b>0.10</b> (0.02)  | <b>0.10</b> (0.02)  | <b>0.16</b> (0.03)  | <b>0.16</b> (0.03)  | <b>0.13</b> (0.03)  | <b>0.13</b> (0.03)  |
| Geschlecht*PV         |                     | -0.01 (0.02)        |                     | -0.02 (0.02)        |                     | -0.02 (0.02)        |                     | -0.02 (0.02)        |
| Geschlecht*Note       |                     |                     | <b>-0.04</b> (0.02) | -0.04 (0.02)        |                     |                     | <b>-0.06</b> (0.02) | <b>-0.06</b> (0.03) |
| EZ*PV                 |                     | 0.07 (0.05)         |                     | 0.06 (0.03)         |                     | 0.03 (0.06)         |                     | -0.01 (0.05)        |

|                    |                     |                     |                     |                     |                     |                     |                     |                     |
|--------------------|---------------------|---------------------|---------------------|---------------------|---------------------|---------------------|---------------------|---------------------|
| EZ*Note            |                     |                     | -0.03 (0.03)        | <b>-0.05</b> (0.02) |                     |                     | -0.02 (0.03)        | -0.03 (0.03)        |
| PV*Note            |                     |                     |                     | <b>0.05</b> (0.01)  |                     |                     |                     | <b>0.04</b> (0.02)  |
| Geschlecht*EZ*PV   |                     | -0.05 (0.03)        |                     | <b>-0.05</b> (0.03) |                     | -0.05 (0.05)        |                     | -0.05 (0.05)        |
| Geschlecht*EZ*Note |                     |                     | 0.01 (0.03)         | 0.03 (0.03)         |                     |                     | -0.01 (0.03)        | 0.01 (0.03)         |
| $R^2$              | 0.06                | 0.11                | 0.28                | 0.29                | 0.08                | 0.10                | 0.17                | 0.18                |
| <b>Chemie</b>      |                     |                     |                     |                     |                     |                     |                     |                     |
| Intercept          | <b>2.66</b> (0.03)  | <b>2.66</b> (0.02)  | <b>2.68</b> (0.01)  | <b>2.67</b> (0.02)  | <b>2.39</b> (0.03)  | <b>2.39</b> (0.02)  | <b>2.41</b> (0.02)  | <b>2.39</b> (0.02)  |
| Geschlecht         | <b>-0.18</b> (0.03) | <b>-0.19</b> (0.02) | <b>-0.20</b> (0.02) | <b>-0.20</b> (0.02) | <b>-0.22</b> (0.03) | <b>-0.23</b> (0.03) | <b>-0.24</b> (0.02) | <b>-0.24</b> (0.02) |
| EZ                 | <b>-0.08</b> (0.04) | <b>-0.07</b> (0.02) | <b>-0.09</b> (0.02) | <b>-0.08</b> (0.02) | <b>-0.07</b> (0.03) | <b>-0.06</b> (0.02) | <b>-0.07</b> (0.02) | <b>-0.07</b> (0.03) |
| PV                 |                     | <b>0.14</b> (0.02)  |                     | 0.02 (0.02)         |                     | <b>0.14</b> (0.03)  |                     | <b>0.05</b> (0.02)  |
| Note               |                     |                     | <b>0.43</b> (0.01)  | <b>0.42</b> (0.01)  |                     |                     | <b>0.32</b> (0.02)  | <b>0.30</b> (0.02)  |
| Geschlecht*EZ      | 0.06 (0.03)         | 0.05 (0.03)         | 0.01 (0.03)         | 0.01 (0.03)         | <b>0.08</b> (0.03)  | <b>0.08</b> (0.03)  | 0.05 (0.03)         | 0.05 (0.03)         |
| Geschlecht*PV      |                     | -0.01 (0.04)        |                     | -0.02 (0.03)        |                     | -0.01 (0.04)        |                     | -0.01 (0.03)        |
| Geschlecht*Note    |                     |                     | -0.03 (0.02)        | -0.02 (0.02)        |                     |                     | -0.03 (0.03)        | -0.03 (0.03)        |
| EZ*PV              |                     | 0.06 (0.04)         |                     | 0.05 (0.03)         |                     | 0.04 (0.07)         |                     | 0.02 (0.06)         |
| EZ*Note            |                     |                     | <b>-0.04</b> (0.02) | <b>-0.05</b> (0.02) |                     |                     | -0.01 (0.04)        | -0.02 (0.03)        |
| PV*Note            |                     |                     |                     | <b>0.05</b> (0.01)  |                     |                     |                     | <b>0.04</b> (0.02)  |
| Geschlecht*EZ*PV   |                     | -0.01 (0.04)        |                     | -0.03 (0.05)        |                     | -0.05 (0.06)        |                     | -0.06 (0.06)        |
| Geschlecht*EZ*Note |                     |                     | 0.02 (0.02)         | 0.03 (0.04)         |                     |                     | -0.02 (0.03)        | 0.00 (0.03)         |
| $R^2$              | 0.01                | 0.06                | 0.28                | 0.28                | 0.01                | 0.04                | 0.14                | 0.14                |
| <b>Biologie</b>    |                     |                     |                     |                     |                     |                     |                     |                     |
| Intercept          | <b>2.81</b> (0.02)  | <b>2.82</b> (0.01)  | <b>2.82</b> (0.01)  | <b>2.82</b> (0.01)  | <b>2.48</b> (0.02)  | <b>2.49</b> (0.02)  | <b>2.49</b> (0.02)  | <b>2.49</b> (0.02)  |
| Geschlecht         | 0.02 (0.02)         | -0.01 (0.02)        | -0.02 (0.02)        | -0.03 (0.02)        | <b>0.05</b> (0.02)  | 0.02 (0.02)         | 0.02 (0.02)         | 0.01 (0.02)         |
| EZ                 | <b>-0.09</b> (0.04) | <b>-0.08</b> (0.02) | <b>-0.08</b> (0.02) | <b>-0.08</b> (0.02) | <b>-0.10</b> (0.03) | <b>-0.10</b> (0.02) | <b>-0.09</b> (0.03) | <b>-0.09</b> (0.02) |
| PV                 |                     | <b>0.12</b> (0.01)  |                     | <b>0.05</b> (0.02)  |                     | <b>0.12</b> (0.02)  |                     | <b>0.07</b> (0.01)  |
| Note               |                     |                     | <b>0.30</b> (0.02)  | <b>0.28</b> (0.02)  |                     |                     | <b>0.21</b> (0.03)  | <b>0.19</b> (0.02)  |
| Geschlecht*EZ      | <b>0.07</b> (0.03)  | <b>0.06</b> (0.03)  | 0.04 (0.03)         | 0.04 (0.03)         | <b>0.15</b> (0.03)  | <b>0.14</b> (0.03)  | <b>0.13</b> (0.03)  | <b>0.13</b> (0.03)  |
| Geschlecht*PV      |                     | 0.03 (0.03)         |                     | 0.01 (0.02)         |                     | 0.02 (0.03)         |                     | 0.01 (0.03)         |
| Geschlecht*Note    |                     |                     | 0.00 (0.03)         | -0.01 (0.03)        |                     |                     | 0.00 (0.03)         | -0.01 (0.03)        |
| EZ*PV              |                     | <b>0.06</b> (0.03)  |                     | 0.03 (0.02)         |                     | 0.02 (0.04)         |                     | 0.00 (0.04)         |
| EZ*Note            |                     |                     | 0.01 (0.02)         | -0.01 (0.02)        |                     |                     | 0.00 (0.03)         | -0.01 (0.02)        |
| PV*Note            |                     |                     |                     | 0.01 (0.01)         |                     |                     |                     | 0.01 (0.01)         |
| Geschlecht*EZ*PV   |                     | -0.02 (0.03)        |                     | -0.01 (0.04)        |                     | 0.01 (0.05)         |                     | 0.01 (0.05)         |
| Geschlecht*EZ*Note |                     |                     | -0.01 (0.03)        | 0.00 (0.04)         |                     |                     | 0.00 (0.03)         | -0.01 (0.03)        |
| $R^2$              | 0.01                | 0.06                | 0.20                | 0.20                | 0.01                | 0.04                | 0.08                | 0.09                |

|                    |                    |                    |                     |                     |
|--------------------|--------------------|--------------------|---------------------|---------------------|
| <b>Deutsch</b>     |                    |                    |                     |                     |
| Intercept          | <b>3.14</b> (0.01) | <b>3.16</b> (0.01) | <b>3.24</b> (0.01)  | <b>3.24</b> (0.01)  |
| Geschlecht         | <b>0.18</b> (0.01) | <b>0.13</b> (0.01) | <b>0.05</b> (0.01)  | <b>0.04</b> (0.01)  |
| EZ                 | <b>0.04</b> (0.01) | <b>0.05</b> (0.01) | 0.00 (0.01)         | 0.01 (0.01)         |
| PV                 |                    | <b>0.14</b> (0.01) |                     | <b>0.06</b> (0.01)  |
| Note               |                    |                    | <b>0.28</b> (0.01)  | <b>0.26</b> (0.01)  |
| Geschlecht*EZ      | 0.00 (0.02)        | 0.00 (0.02)        | 0.02 (0.01)         | 0.02 (0.01)         |
| Geschlecht*PV      |                    | 0.01 (0.01)        |                     | 0.00 (0.01)         |
| Geschlecht*Note    |                    |                    | -0.01 (0.01)        | -0.01 (0.01)        |
| EZ*PV              |                    | 0.00 (0.01)        |                     | 0.01 (0.01)         |
| EZ*Note            |                    |                    | <b>-0.04</b> (0.01) | <b>-0.04</b> (0.01) |
| PV*Note            |                    |                    |                     | 0.00 (0.00)         |
| Geschlecht*EZ*PV   |                    | -0.01 (0.02)       |                     | 0.00 (0.02)         |
| Geschlecht*EZ*Note |                    |                    | 0.00 (0.02)         | 0.00 (0.02)         |
| R <sup>2</sup>     | 0.03               | 0.09               | 0.21                | 0.22                |

*Anmerkungen.* EZ = Erhebungszeitpunkt, PV = Testleistung. Fett gedruckte Regressionskoeffizienten sind statistisch signifikant ( $p < .05$ ).;Bei den schulfachbezogenen Noten entsprechen höhere numerische Werte besseren Leistungen (1 [*ungenügend* oder *mangelhaft*] bis 5 [*sehr gut*]).

**Tabelle ESM4.2**

Ergebnisse der Regressionsanalysen ohne Kontrolle von Leistung (M0) und unter Kontrolle beider Leistungsmaße (Testleistung, Noten; M3) – separat für die Selbstkonzepte und Interessen in Mathematik, Physik, Chemie, Biologie und Deutsch sowie die betrachteten Schularten (Gymnasium, nichtgymnasiale Schulen)

|                                 | Gymnasium    |        |              |        | nichtgymnasiale Schulen |        |              |        |
|---------------------------------|--------------|--------|--------------|--------|-------------------------|--------|--------------|--------|
|                                 | M0           |        | M3           |        | M0                      |        | M3           |        |
|                                 | <i>b</i>     | (SE)   | <i>b</i>     | (SE)   | <i>b</i>                | (SE)   | <i>b</i>     | (SE)   |
| <b>Mathematik Selbstkonzept</b> |              |        |              |        |                         |        |              |        |
| Intercept                       | <b>2.93</b>  | (0.08) | <b>2.71</b>  | (0.04) | <b>2.81</b>             | (0.03) | <b>2.88</b>  | (0.02) |
| Geschlecht                      | <b>-0.42</b> | (0.04) | <b>-0.42</b> | (0.03) | <b>-0.46</b>            | (0.04) | <b>-0.42</b> | (0.03) |
| EZ                              | -0.12        | (0.12) | <b>-0.19</b> | (0.04) | <b>-0.14</b>            | (0.03) | <b>-0.12</b> | (0.03) |
| PV                              |              |        | <b>0.16</b>  | (0.02) |                         |        | <b>0.10</b>  | (0.02) |
| Note                            |              |        | <b>0.46</b>  | (0.02) |                         |        | <b>0.46</b>  | (0.02) |
| Geschlecht*EZ                   | <b>0.16</b>  | (0.05) | <b>0.14</b>  | (0.06) | <b>0.20</b>             | (0.05) | <b>0.16</b>  | (0.03) |
| EZ*PV                           |              |        | <b>0.10</b>  | (0.03) |                         |        | <b>0.06</b>  | (0.03) |
| EZ*Note                         |              |        | -0.01        | (0.03) |                         |        | <b>-0.05</b> | (0.02) |
| <i>R</i> <sup>2</sup>           | 0.05         |        | 0.47         |        | 0.05                    |        | 0.39         |        |
| <b>Mathematik Interesse</b>     |              |        |              |        |                         |        |              |        |
| Intercept                       | <b>2.70</b>  | (0.07) | <b>2.56</b>  | (0.05) | <b>2.64</b>             | (0.03) | <b>2.68</b>  | (0.03) |
| Geschlecht                      | <b>-0.37</b> | (0.05) | <b>-0.38</b> | (0.04) | <b>-0.38</b>            | (0.04) | <b>-0.36</b> | (0.04) |
| EZ                              | <b>-0.30</b> | (0.11) | <b>-0.37</b> | (0.06) | <b>-0.24</b>            | (0.05) | <b>-0.25</b> | (0.04) |
| PV                              |              |        | <b>0.09</b>  | (0.03) |                         |        | 0.04         | (0.02) |
| Note                            |              |        | <b>0.33</b>  | (0.02) |                         |        | <b>0.33</b>  | (0.02) |
| Geschlecht*EZ                   | <b>0.22</b>  | (0.06) | <b>0.22</b>  | (0.05) | <b>0.22</b>             | (0.04) | <b>0.19</b>  | (0.04) |
| EZ*PV                           |              |        | <b>0.08</b>  | (0.04) |                         |        | -0.02        | (0.03) |
| EZ*Note                         |              |        | -0.04        | (0.03) |                         |        | -0.04        | (0.03) |
| <i>R</i> <sup>2</sup>           | 0.04         |        | 0.24         |        | 0.04                    |        | 0.19         |        |
| <b>Physik Selbstkonzept</b>     |              |        |              |        |                         |        |              |        |
| Intercept                       | <b>2.81</b>  | (0.05) | <b>2.69</b>  | (0.03) | <b>2.72</b>             | (0.02) | <b>2.74</b>  | (0.02) |
| Geschlecht                      | <b>-0.47</b> | (0.04) | <b>-0.45</b> | (0.03) | <b>-0.42</b>            | (0.03) | <b>-0.41</b> | (0.02) |
| EZ                              | -0.06        | (0.08) | <b>-0.09</b> | (0.04) | <b>-0.14</b>            | (0.03) | <b>-0.10</b> | (0.03) |
| PV                              |              |        | <b>0.08</b>  | (0.02) |                         |        | 0.03         | (0.02) |
| Note                            |              |        | <b>0.38</b>  | (0.01) |                         |        | <b>0.34</b>  | (0.01) |
| Geschlecht*EZ                   | <b>0.09</b>  | (0.04) | 0.05         | (0.04) | <b>0.17</b>             | (0.03) | <b>0.13</b>  | (0.03) |
| EZ*PV                           |              |        | 0.04         | (0.04) |                         |        | 0.04         | (0.03) |
| EZ*Note                         |              |        | -0.01        | (0.02) |                         |        | <b>-0.06</b> | (0.02) |
| <i>R</i> <sup>2</sup>           | 0.08         |        | 0.35         |        | 0.06                    |        | 0.25         |        |
| <b>Physik Interesse</b>         |              |        |              |        |                         |        |              |        |
| Intercept                       | <b>2.54</b>  | (0.04) | <b>2.42</b>  | (0.04) | <b>2.45</b>             | (0.03) | <b>2.48</b>  | (0.02) |
| Geschlecht                      | <b>-0.56</b> | (0.04) | <b>-0.54</b> | (0.04) | <b>-0.53</b>            | (0.03) | <b>-0.51</b> | (0.03) |
| EZ                              | -0.08        | (0.06) | <b>-0.10</b> | (0.05) | <b>-0.13</b>            | (0.03) | <b>-0.11</b> | (0.03) |
| PV                              |              |        | <b>0.08</b>  | (0.02) |                         |        | <b>0.05</b>  | (0.03) |
| Note                            |              |        | <b>0.27</b>  | (0.02) |                         |        | <b>0.24</b>  | (0.02) |
| Geschlecht*EZ                   | 0.09         | (0.05) | 0.05         | (0.05) | <b>0.20</b>             | (0.04) | <b>0.17</b>  | (0.04) |
| EZ*PV                           |              |        | 0.03         | (0.04) |                         |        | -0.01        | (0.04) |
| EZ*Note                         |              |        | -0.01        | (0.03) |                         |        | -0.04        | (0.02) |
| <i>R</i> <sup>2</sup>           | 0.10         |        | 0.22         |        | 0.07                    |        | 0.16         |        |
| <b>Chemie Selbstkonzept</b>     |              |        |              |        |                         |        |              |        |
| Intercept                       | <b>2.71</b>  | (0.06) | <b>2.59</b>  | (0.04) | <b>2.63</b>             | (0.02) | <b>2.70</b>  | (0.02) |
| Geschlecht                      | <b>-0.22</b> | (0.05) | <b>-0.22</b> | (0.03) | <b>-0.16</b>            | (0.03) | <b>-0.18</b> | (0.02) |

|                                      |                     |                     |                     |                     |
|--------------------------------------|---------------------|---------------------|---------------------|---------------------|
| EZ                                   | -0.05 (0.10)        | -0.09 (0.05)        | <b>-0.10</b> (0.03) | <b>-0.08</b> (0.03) |
| PV                                   |                     | <b>0.08</b> (0.03)  |                     | 0.02 (0.02)         |
| Note                                 |                     | <b>0.41</b> (0.02)  |                     | <b>0.40</b> (0.01)  |
| Geschlecht*EZ                        | 0.06 (0.05)         | -0.03 (0.05)        | 0.05 (0.04)         | 0.02 (0.03)         |
| EZ*PV                                |                     | 0.04 (0.03)         |                     | 0.05 (0.03)         |
| EZ*Note                              |                     | 0.03 (0.02)         |                     | <b>-0.08</b> (0.02) |
| $R^2$                                | 0.01                | 0.34                | 0.01                | 0.25                |
| <b><i>Chemie Interesse</i></b>       |                     |                     |                     |                     |
| Intercept                            | <b>2.45</b> (0.07)  | <b>2.32</b> (0.05)  | <b>2.36</b> (0.03)  | <b>2.42</b> (0.03)  |
| Geschlecht                           | <b>-0.25</b> (0.06) | <b>-0.25</b> (0.05) | <b>-0.21</b> (0.03) | <b>-0.23</b> (0.03) |
| EZ                                   | -0.06 (0.10)        | -0.08 (0.05)        | -0.07 (0.04)        | -0.07 (0.04)        |
| PV                                   |                     | <b>0.11</b> (0.03)  |                     | <b>0.06</b> (0.03)  |
| Note                                 |                     | <b>0.30</b> (0.02)  |                     | <b>0.28</b> (0.02)  |
| Geschlecht*EZ                        | 0.05 (0.05)         | -0.02 (0.04)        | <b>0.10</b> (0.04)  | <b>0.08</b> (0.04)  |
| EZ*PV                                |                     | 0.03 (0.05)         |                     | 0.00 (0.04)         |
| EZ*Note                              |                     | 0.01 (0.03)         |                     | -0.04 (0.02)        |
| $R^2$                                | 0.02                | 0.19                | 0.01                | 0.12                |
| <b><i>Biologie Selbstkonzept</i></b> |                     |                     |                     |                     |
| Intercept                            | <b>2.92</b> (0.04)  | <b>2.86</b> (0.04)  | <b>2.75</b> (0.02)  | <b>2.82</b> (0.02)  |
| Geschlecht                           | 0.01 (0.04)         | -0.04 (0.03)        | 0.02 (0.03)         | -0.03 (0.02)        |
| EZ                                   | -0.05 (0.06)        | -0.08 (0.05)        | <b>-0.12</b> (0.02) | <b>-0.09</b> (0.03) |
| PV                                   |                     | 0.03 (0.03)         |                     | <b>0.06</b> (0.02)  |
| Note                                 |                     | <b>0.30</b> (0.02)  |                     | <b>0.27</b> (0.01)  |
| Geschlecht*EZ                        | <b>0.07</b> (0.04)  | 0.04 (0.05)         | 0.07 (0.04)         | 0.04 (0.03)         |
| EZ*PV                                |                     | 0.04 (0.04)         |                     | 0.02 (0.02)         |
| EZ*Note                              |                     | -0.02 (0.02)        |                     | -0.01 (0.02)        |
| $R^2$                                | 0.00                | 0.19                | 0.01                | 0.18                |
| <b><i>Biologie Interesse</i></b>     |                     |                     |                     |                     |
| Intercept                            | <b>2.58</b> (0.04)  | <b>2.51</b> (0.05)  | <b>2.43</b> (0.03)  | <b>2.49</b> (0.03)  |
| Geschlecht                           | 0.06 (0.04)         | 0.02 (0.04)         | 0.04 (0.03)         | 0.00 (0.03)         |
| EZ                                   | -0.08 (0.04)        | -0.09 (0.05)        | <b>-0.12</b> (0.03) | <b>-0.12</b> (0.03) |
| PV                                   |                     | 0.05 (0.03)         |                     | <b>0.07</b> (0.02)  |
| Note                                 |                     | <b>0.20</b> (0.02)  |                     | <b>0.18</b> (0.02)  |
| Geschlecht*EZ                        | <b>0.18</b> (0.04)  | <b>0.16</b> (0.04)  | <b>0.13</b> (0.04)  | <b>0.12</b> (0.04)  |
| EZ*PV                                |                     | 0.02 (0.04)         |                     | -0.03 (0.03)        |
| EZ*Note                              |                     | -0.03 (0.03)        |                     | 0.00 (0.03)         |
| $R^2$                                | 0.01                | 0.08                | 0.01                | 0.07                |
| <b><i>Deutsch Selbstkonzept</i></b>  |                     |                     |                     |                     |
| Intercept                            | <b>3.22</b> (0.02)  | <b>3.21</b> (0.02)  | <b>3.10</b> (0.01)  | <b>3.24</b> (0.01)  |
| Geschlecht                           | <b>0.18</b> (0.02)  | 0.03 (0.02)         | <b>0.18</b> (0.01)  | <b>0.05</b> (0.01)  |
| EZ                                   | 0.01 (0.02)         | -0.03 (0.03)        | <b>0.05</b> (0.02)  | <b>0.03</b> (0.02)  |
| PV                                   |                     | <b>0.08</b> (0.01)  |                     | <b>0.07</b> (0.01)  |
| Note                                 |                     | <b>0.25</b> (0.01)  |                     | <b>0.26</b> (0.01)  |
| Geschlecht*EZ                        | 0.01 (0.02)         | 0.02 (0.02)         | 0.00 (0.02)         | 0.01 (0.02)         |
| EZ*PV                                |                     | 0.02 (0.02)         |                     | 0.03 (0.02)         |
| EZ*Note                              |                     | <b>-0.03</b> (0.01) |                     | <b>-0.05</b> (0.01) |
| $R^2$                                | 0.03                | 0.23                | 0.02                | 0.20                |

*Anmerkungen.* EZ = Erhebungszeitpunkt, PV = Testleistung. Fett gedruckte Regressionskoeffizienten sind statistisch signifikant ( $p < .05$ ). Bei den schulfachbezogenen Noten entsprechen höhere numerische Werte besseren Leistungen (1 [*ungenügend* oder *mangelhaft*] bis 5 [*sehr gut*]).

**Tabelle ESM4.3**

Ergebnisse der Regressionsanalysen ohne Kontrolle von Leistung (M0) und unter Kontrolle beider Leistungsmaße (Testleistung, Noten; M3) – separat für die Selbstkonzepte und Interessen in Mathematik, Physik, Chemie, Biologie und Deutsch sowie die betrachteten Ländergruppen (ostdeutsche Länder, westdeutsche Länder, Stadtstaaten)

|                                 | ostdeutsche Länder |        |          |        | westdeutsche Länder |        |          |        | Stadtstaaten |        |          |        |
|---------------------------------|--------------------|--------|----------|--------|---------------------|--------|----------|--------|--------------|--------|----------|--------|
|                                 | M0                 |        | M3       |        | M0                  |        | M3       |        | M0           |        | M3       |        |
|                                 | <i>b</i>           | (SE)   | <i>b</i> | (SE)   | <i>b</i>            | (SE)   | <i>b</i> | (SE)   | <i>b</i>     | (SE)   | <i>b</i> | (SE)   |
| <i>Mathematik Selbstkonzept</i> |                    |        |          |        |                     |        |          |        |              |        |          |        |
| Intercept                       | 2.77               | (0.05) | 2.72     | (0.03) | 2.87                | (0.05) | 2.87     | (0.02) | 2.76         | (0.04) | 2.81     | (0.03) |
| Geschlecht                      | -0.40              | (0.04) | -0.39    | (0.04) | -0.45               | (0.04) | -0.44    | (0.03) | -0.41        | (0.04) | -0.40    | (0.04) |
| EZ                              | -0.12              | (0.04) | -0.10    | (0.05) | -0.14               | (0.08) | -0.13    | (0.02) | -0.08        | (0.07) | -0.13    | (0.04) |
| PV                              |                    |        | 0.08     | (0.03) |                     |        | 0.08     | (0.02) |              |        | 0.07     | (0.03) |
| Note                            |                    |        | 0.49     | (0.02) |                     |        | 0.48     | (0.02) |              |        | 0.46     | (0.02) |
| Geschlecht*EZ                   | 0.14               | (0.06) | 0.09     | (0.04) | 0.19                | (0.03) | 0.15     | (0.03) | 0.17         | (0.05) | 0.15     | (0.04) |
| EZ*PV                           |                    |        | 0.04     | (0.06) |                     |        | 0.04     | (0.02) |              |        | 0.12     | (0.03) |
| EZ*Note                         |                    |        | -0.02    | (0.03) |                     |        | -0.02    | (0.02) |              |        | -0.15    | (0.04) |
| R <sup>2</sup>                  | 0.04               |        | 0.44     |        | 0.05                |        | 0.41     |        | 0.04         |        | 0.36     |        |
| <i>Mathematik Interesse</i>     |                    |        |          |        |                     |        |          |        |              |        |          |        |
| Intercept                       | 2.64               | (0.06) | 2.61     | (0.04) | 2.66                | (0.04) | 2.67     | (0.03) | 2.67         | (0.04) | 2.70     | (0.03) |
| Geschlecht                      | -0.39              | (0.05) | -0.38    | (0.05) | -0.37               | (0.04) | -0.37    | (0.03) | -0.36        | (0.04) | -0.36    | (0.04) |
| EZ                              | -0.31              | (0.06) | -0.29    | (0.04) | -0.25               | (0.07) | -0.24    | (0.04) | -0.27        | (0.04) | -0.31    | (0.04) |
| PV                              |                    |        | 0.04     | (0.03) |                     |        | 0.02     | (0.02) |              |        | 0.02     | (0.03) |
| Note                            |                    |        | 0.32     | (0.02) |                     |        | 0.34     | (0.02) |              |        | 0.32     | (0.03) |
| Geschlecht*EZ                   | 0.22               | (0.09) | 0.18     | (0.08) | 0.21                | (0.04) | 0.18     | (0.04) | 0.22         | (0.05) | 0.21     | (0.05) |
| EZ*PV                           |                    |        | -0.02    | (0.08) |                     |        | -0.02    | (0.02) |              |        | 0.05     | (0.08) |
| EZ*Note                         |                    |        | -0.02    | (0.04) |                     |        | -0.02    | (0.02) |              |        | -0.12    | (0.03) |
| R <sup>2</sup>                  | 0.05               |        | 0.21     |        | 0.04                |        | 0.19     |        | 0.04         |        | 0.17     |        |
| <i>Physik Selbstkonzept</i>     |                    |        |          |        |                     |        |          |        |              |        |          |        |
| Intercept                       | 2.73               | (0.03) | 2.70     | (0.03) | 2.76                | (0.03) | 2.74     | (0.02) | 2.64         | (0.03) | 2.71     | (0.02) |
| Geschlecht                      | -0.41              | (0.04) | -0.42    | (0.04) | -0.44               | (0.03) | -0.43    | (0.02) | -0.38        | (0.04) | -0.37    | (0.03) |
| EZ                              | -0.06              | (0.03) | -0.04    | (0.04) | -0.13               | (0.05) | -0.10    | (0.02) | -0.05        | (0.06) | -0.09    | (0.03) |
| PV                              |                    |        | 0.06     | (0.03) |                     |        | 0.03     | (0.02) |              |        | -0.01    | (0.02) |

|               |             |                    |                    |                     |                    |                     |
|---------------|-------------|--------------------|--------------------|---------------------|--------------------|---------------------|
| Note          |             | <b>0.34</b> (0.03) |                    | <b>0.36</b> (0.01)  |                    | <b>0.35</b> (0.02)  |
| Geschlecht*EZ | 0.07 (0.05) | 0.03 (0.04)        | <b>0.16</b> (0.03) | <b>0.11</b> (0.03)  | <b>0.11</b> (0.04) | 0.08 (0.05)         |
| EZ*PV         |             | -0.03 (0.03)       |                    | 0.03 (0.04)         |                    | <b>0.11</b> (0.02)  |
| EZ*Note       |             | 0.00 (0.03)        |                    | <b>-0.04</b> (0.02) |                    | <b>-0.13</b> (0.03) |
| $R^2$         | 0.07        | 0.31               | 0.06               | 0.27                | 0.05               | 0.24                |

### *Physik Interesse*

|               |                     |                     |                     |                     |                     |                     |
|---------------|---------------------|---------------------|---------------------|---------------------|---------------------|---------------------|
| Intercept     | <b>2.58</b> (0.03)  | <b>2.55</b> (0.03)  | <b>2.47</b> (0.03)  | <b>2.46</b> (0.02)  | <b>2.44</b> (0.04)  | <b>2.49</b> (0.04)  |
| Geschlecht    | <b>-0.54</b> (0.05) | <b>-0.54</b> (0.06) | <b>-0.54</b> (0.03) | <b>-0.53</b> (0.03) | <b>-0.49</b> (0.05) | <b>-0.48</b> (0.05) |
| EZ            | <b>-0.11</b> (0.04) | <b>-0.09</b> (0.04) | <b>-0.11</b> (0.04) | <b>-0.09</b> (0.03) | <b>-0.13</b> (0.05) | <b>-0.16</b> (0.05) |
| PV            |                     | 0.05 (0.03)         |                     | <b>0.05</b> (0.02)  |                     | -0.01 (0.03)        |
| Note          |                     | <b>0.23</b> (0.03)  |                     | <b>0.26</b> (0.02)  |                     | <b>0.26</b> (0.03)  |
| Geschlecht*EZ | 0.08 (0.05)         | 0.05 (0.07)         | <b>0.17</b> (0.04)  | <b>0.13</b> (0.03)  | <b>0.17</b> (0.06)  | <b>0.15</b> (0.06)  |
| EZ*PV         |                     | -0.04 (0.04)        |                     | -0.01 (0.04)        |                     | <b>0.09</b> (0.04)  |
| EZ*Note       |                     | 0.00 (0.04)         |                     | -0.02 (0.02)        |                     | <b>-0.14</b> (0.04) |
| $R^2$         | 0.10                | 0.19                | 0.08                | 0.17                | 0.06                | 0.14                |

### *Chemie Selbstkonzept*

|               |                     |                     |                     |                     |                     |                     |
|---------------|---------------------|---------------------|---------------------|---------------------|---------------------|---------------------|
| Intercept     | <b>2.65</b> (0.03)  | <b>2.66</b> (0.03)  | <b>2.66</b> (0.03)  | <b>2.69</b> (0.02)  | <b>2.64</b> (0.03)  | <b>2.71</b> (0.03)  |
| Geschlecht    | <b>-0.23</b> (0.03) | <b>-0.28</b> (0.03) | <b>-0.16</b> (0.03) | <b>-0.18</b> (0.02) | <b>-0.29</b> (0.05) | <b>-0.30</b> (0.04) |
| EZ            | <b>-0.08</b> (0.03) | <b>-0.08</b> (0.04) | -0.08 (0.05)        | <b>-0.08</b> (0.02) | -0.06 (0.05)        | <b>-0.10</b> (0.04) |
| PV            |                     | -0.01 (0.02)        |                     | 0.02 (0.02)         |                     | -0.03 (0.02)        |
| Note          |                     | <b>0.40</b> (0.02)  |                     | <b>0.42</b> (0.01)  |                     | <b>0.39</b> (0.02)  |
| Geschlecht*EZ | <b>0.10</b> (0.04)  | 0.03 (0.04)         | 0.05 (0.05)         | 0.00 (0.04)         | <b>0.16</b> (0.07)  | <b>0.12</b> (0.05)  |
| EZ*PV         |                     | 0.03 (0.03)         |                     | 0.03 (0.02)         |                     | <b>0.11</b> (0.03)  |
| EZ*Note       |                     | 0.00 (0.02)         |                     | <b>-0.04</b> (0.02) |                     | <b>-0.12</b> (0.03) |
| $R^2$         | 0.02                | 0.28                | 0.01                | 0.27                | 0.02                | 0.25                |

### *Chemie Interesse*

|               |                     |                     |                     |                     |                     |                     |
|---------------|---------------------|---------------------|---------------------|---------------------|---------------------|---------------------|
| Intercept     | <b>2.41</b> (0.04)  | <b>2.41</b> (0.04)  | <b>2.38</b> (0.04)  | <b>2.40</b> (0.02)  | <b>2.42</b> (0.04)  | <b>2.48</b> (0.04)  |
| Geschlecht    | <b>-0.26</b> (0.05) | <b>-0.29</b> (0.05) | <b>-0.21</b> (0.03) | <b>-0.23</b> (0.03) | <b>-0.32</b> (0.05) | <b>-0.33</b> (0.05) |
| EZ            | -0.05 (0.05)        | -0.05 (0.05)        | <b>-0.07</b> (0.03) | <b>-0.07</b> (0.03) | -0.11 (0.07)        | <b>-0.13</b> (0.05) |
| PV            |                     | -0.02 (0.03)        |                     | <b>0.06</b> (0.02)  |                     | 0.00 (0.02)         |
| Note          |                     | <b>0.30</b> (0.03)  |                     | <b>0.30</b> (0.02)  |                     | <b>0.29</b> (0.02)  |
| Geschlecht*EZ | 0.07 (0.05)         | 0.03 (0.05)         | <b>0.08</b> (0.03)  | 0.05 (0.03)         | <b>0.18</b> (0.06)  | <b>0.15</b> (0.05)  |
| EZ*PV         |                     | 0.01 (0.03)         |                     | -0.01 (0.05)        |                     | <b>0.07</b> (0.03)  |
| EZ*Note       |                     | -0.02 (0.03)        |                     | -0.02 (0.03)        |                     | <b>-0.09</b> (0.04) |
| $R^2$         | 0.02                | 0.13                | 0.01                | 0.14                | 0.02                | 0.13                |

|                               |                     |                     |                     |                     |                     |                     |
|-------------------------------|---------------------|---------------------|---------------------|---------------------|---------------------|---------------------|
| <b>Biologie Selbstkonzept</b> |                     |                     |                     |                     |                     |                     |
| Intercept                     | <b>2.74</b> (0.02)  | <b>2.75</b> (0.02)  | <b>2.82</b> (0.02)  | <b>2.84</b> (0.02)  | <b>2.79</b> (0.04)  | <b>2.87</b> (0.03)  |
| Geschlecht                    | <b>0.08</b> (0.03)  | -0.02 (0.02)        | 0.02 (0.03)         | -0.04 (0.02)        | 0.01 (0.04)         | -0.03 (0.03)        |
| EZ                            | -0.04 (0.04)        | -0.03 (0.04)        | <b>-0.10</b> (0.05) | <b>-0.08</b> (0.02) | <b>-0.12</b> (0.05) | <b>-0.15</b> (0.03) |
| PV                            |                     | 0.05 (0.03)         |                     | <b>0.06</b> (0.01)  |                     | 0.03 (0.02)         |
| Note                          |                     | <b>0.33</b> (0.02)  |                     | <b>0.27</b> (0.01)  |                     | <b>0.28</b> (0.02)  |
| Geschlecht*EZ                 | 0.12 (0.07)         | 0.07 (0.04)         | 0.06 (0.04)         | 0.03 (0.04)         | <b>0.11</b> (0.04)  | <b>0.08</b> (0.04)  |
| EZ*PV                         |                     | -0.01 (0.03)        |                     | 0.02 (0.02)         |                     | <b>0.10</b> (0.02)  |
| EZ*Note                       |                     | -0.02 (0.02)        |                     | 0.00 (0.02)         |                     | <b>-0.10</b> (0.03) |
| R <sup>2</sup>                | 0.01                | 0.25                | 0.00                | 0.19                | 0.01                | 0.19                |
| <b>Biologie Interesse</b>     |                     |                     |                     |                     |                     |                     |
| Intercept                     | <b>2.51</b> (0.03)  | <b>2.51</b> (0.03)  | <b>2.47</b> (0.03)  | <b>2.48</b> (0.02)  | <b>2.57</b> (0.05)  | <b>2.63</b> (0.04)  |
| Geschlecht                    | <b>0.09</b> (0.04)  | 0.03 (0.04)         | 0.05 (0.03)         | 0.00 (0.03)         | 0.02 (0.05)         | -0.01 (0.04)        |
| EZ                            | <b>-0.11</b> (0.04) | <b>-0.11</b> (0.04) | <b>-0.09</b> (0.04) | <b>-0.08</b> (0.03) | <b>-0.22</b> (0.05) | <b>-0.23</b> (0.04) |
| PV                            |                     | 0.05 (0.03)         |                     | <b>0.08</b> (0.02)  |                     | 0.04 (0.03)         |
| Note                          |                     | <b>0.22</b> (0.02)  |                     | <b>0.19</b> (0.02)  |                     | <b>0.19</b> (0.03)  |
| Geschlecht*EZ                 | <b>0.19</b> (0.06)  | <b>0.17</b> (0.05)  | <b>0.13</b> (0.04)  | <b>0.12</b> (0.04)  | <b>0.21</b> (0.06)  | <b>0.20</b> (0.05)  |
| EZ*PV                         |                     | -0.03 (0.03)        |                     | 0.01 (0.03)         |                     | <b>0.07</b> (0.03)  |
| EZ*Note                       |                     | -0.01 (0.03)        |                     | -0.01 (0.02)        |                     | <b>-0.08</b> (0.03) |
| R <sup>2</sup>                | 0.02                | 0.11                | 0.01                | 0.08                | 0.02                | 0.08                |
| <b>Deutsch Selbstkonzept</b>  |                     |                     |                     |                     |                     |                     |
| Intercept                     | <b>3.08</b> (0.02)  | <b>3.13</b> (0.01)  | <b>3.14</b> (0.01)  | <b>3.25</b> (0.01)  | <b>3.18</b> (0.02)  | <b>3.28</b> (0.02)  |
| Geschlecht                    | <b>0.20</b> (0.02)  | <b>0.06</b> (0.01)  | <b>0.18</b> (0.01)  | <b>0.04</b> (0.01)  | <b>0.15</b> (0.02)  | <b>0.04</b> (0.02)  |
| EZ                            | <b>0.07</b> (0.02)  | <b>0.04</b> (0.02)  | <b>0.03</b> (0.02)  | 0.01 (0.01)         | 0.06 (0.03)         | 0.03 (0.02)         |
| PV                            |                     | <b>0.09</b> (0.01)  |                     | <b>0.05</b> (0.01)  |                     | <b>0.10</b> (0.01)  |
| Note                          |                     | <b>0.22</b> (0.01)  |                     | <b>0.27</b> (0.01)  |                     | <b>0.19</b> (0.01)  |
| Geschlecht*EZ                 | -0.02 (0.02)        | -0.03 (0.02)        | 0.00 (0.02)         | 0.02 (0.02)         | 0.01 (0.03)         | 0.02 (0.03)         |
| EZ*PV                         |                     | 0.03 (0.02)         |                     | 0.01 (0.01)         |                     | -0.01 (0.02)        |
| EZ*Note                       |                     | <b>-0.04</b> (0.01) |                     | <b>-0.04</b> (0.01) |                     | <b>-0.05</b> (0.02) |
| R <sup>2</sup>                | 0.03                | 0.22                | 0.03                | 0.21                | 0.02                | 0.18                |

*Anmerkungen.* EZ = Erhebungszeitpunkt, PV = Testleistung. Fett gedruckte Regressionskoeffizienten sind statistisch signifikant ( $p < .05$ ). Bei den schulfachbezogenen Noten entsprechen höhere numerische Werte besseren Leistungen (1 [*ungenügend* oder *mangelhaft*] bis 5 [*sehr gut*]).

**Tabelle ESM4.4**

Ergebnisse der Regressionsanalysen ohne Kontrolle von Leistung (M0) und unter Kontrolle beider Leistungsmaße (M3) – separat für die Selbstkonzepte und Interessen in Mathematik, Physik, Chemie, Biologie und Deutsch sowie in Abhängigkeit von Schulstrukturreformen (Länder mit (etabliert) zwei- oder dreigliedrigem Schulsystem, Reformländer)

|                                 | Länder mit etabliertem Schulsystem |        |              |        | Reformländer |        |              |        |
|---------------------------------|------------------------------------|--------|--------------|--------|--------------|--------|--------------|--------|
|                                 | Schulsystem                        |        |              |        |              |        |              |        |
|                                 | M0                                 | M3     | M0           | M3     | M0           | M3     | M0           | M3     |
|                                 | <i>b</i>                           | (SE)   | <i>b</i>     | (SE)   | <i>b</i>     | (SE)   | <i>b</i>     | (SE)   |
| <b>Mathematik Selbstkonzept</b> |                                    |        |              |        |              |        |              |        |
| Intercept                       | <b>2.79</b>                        | (0.06) | <b>2.83</b>  | (0.02) | <b>2.86</b>  | (0.05) | <b>2.85</b>  | (0.02) |
| Geschlecht                      | <b>-0.36</b>                       | (0.03) | <b>-0.35</b> | (0.03) | <b>-0.45</b> | (0.04) | <b>-0.45</b> | (0.03) |
| EZ                              | -0.11                              | (0.08) | <b>-0.13</b> | (0.04) | -0.14        | (0.07) | <b>-0.13</b> | (0.02) |
| PV                              |                                    |        | <b>0.05</b>  | (0.02) |              |        | <b>0.08</b>  | (0.02) |
| Note                            |                                    |        | <b>0.50</b>  | (0.02) |              |        | <b>0.47</b>  | (0.02) |
| Geschlecht*EZ                   | 0.14                               | (0.08) | <b>0.13</b>  | (0.06) | 0.19         | (0.04) | <b>0.15</b>  | (0.03) |
| EZ*PV                           |                                    |        | 0.09         | (0.06) |              |        | 0.04         | (0.02) |
| EZ*Note                         |                                    |        | -0.11        | (0.03) |              |        | -0.01        | (0.02) |
| R <sup>2</sup>                  | 0.03                               |        | 0.40         |        | 0.05         |        | 0.41         |        |
| <b>Mathematik Interesse</b>     |                                    |        |              |        |              |        |              |        |
| Intercept                       | <b>2.66</b>                        | (0.04) | <b>2.69</b>  | (0.03) | <b>2.66</b>  | (0.04) | <b>2.66</b>  | (0.03) |
| Geschlecht                      | <b>-0.32</b>                       | (0.04) | <b>-0.32</b> | (0.04) | <b>-0.38</b> | (0.04) | <b>-0.38</b> | (0.03) |
| EZ                              | <b>-0.26</b>                       | (0.06) | <b>-0.29</b> | (0.04) | <b>-0.26</b> | (0.07) | <b>-0.25</b> | (0.04) |
| PV                              |                                    |        | 0.01         | (0.02) |              |        | 0.02         | (0.02) |
| Note                            |                                    |        | <b>0.38</b>  | (0.02) |              |        | <b>0.33</b>  | (0.02) |
| Geschlecht*EZ                   | <b>0.20</b>                        | (0.07) | <b>0.19</b>  | (0.06) | <b>0.22</b>  | (0.05) | <b>0.18</b>  | (0.04) |
| EZ*PV                           |                                    |        | 0.04         | (0.06) |              |        | -0.02        | (0.02) |
| EZ*Note                         |                                    |        | -0.11        | (0.03) |              |        | -0.02        | (0.02) |
| R <sup>2</sup>                  | 0.03                               |        | 0.21         |        | 0.04         |        | 0.20         |        |
| <b>Physik Selbstkonzept</b>     |                                    |        |              |        |              |        |              |        |
| Intercept                       | <b>2.67</b>                        | (0.03) | <b>2.71</b>  | (0.03) | <b>2.76</b>  | (0.03) | <b>2.74</b>  | (0.02) |
| Geschlecht                      | <b>-0.37</b>                       | (0.03) | <b>-0.37</b> | (0.03) | <b>-0.45</b> | (0.03) | <b>-0.43</b> | (0.02) |
| EZ                              | -0.03                              | (0.05) | -0.06        | (0.03) | -0.13        | (0.05) | <b>-0.11</b> | (0.02) |
| PV                              |                                    |        | 0.01         | (0.02) |              |        | <b>0.03</b>  | (0.02) |
| Note                            |                                    |        | <b>0.38</b>  | (0.02) |              |        | <b>0.35</b>  | (0.01) |
| Geschlecht*EZ                   | 0.10                               | (0.05) | 0.07         | (0.04) | 0.15         | (0.03) | <b>0.10</b>  | (0.03) |
| EZ*PV                           |                                    |        | <b>0.08</b>  | (0.03) |              |        | 0.03         | (0.03) |
| EZ*Note                         |                                    |        | <b>-0.10</b> | (0.03) |              |        | -0.03        | (0.02) |
| R <sup>2</sup>                  | 0.05                               |        | 0.28         |        | 0.07         |        | 0.28         |        |
| <b>Physik Interesse</b>         |                                    |        |              |        |              |        |              |        |
| Intercept                       | <b>2.44</b>                        | (0.03) | <b>2.71</b>  | (0.03) | <b>2.49</b>  | (0.02) | <b>2.74</b>  | (0.02) |
| Geschlecht                      | <b>-0.49</b>                       | (0.04) | <b>-0.37</b> | (0.03) | <b>-0.54</b> | (0.03) | <b>-0.43</b> | (0.02) |
| EZ                              | -0.06                              | (0.06) | <b>-0.06</b> | (0.03) | -0.12        | (0.03) | <b>-0.11</b> | (0.02) |
| PV                              |                                    |        | <b>0.01</b>  | (0.02) |              |        | <b>0.03</b>  | (0.02) |
| Note                            |                                    |        | <b>0.38</b>  | (0.02) |              |        | <b>0.35</b>  | (0.01) |
| Geschlecht*EZ                   | <b>0.15</b>                        | (0.06) | <b>0.07</b>  | (0.04) | <b>0.16</b>  | (0.03) | <b>0.10</b>  | (0.03) |
| EZ*PV                           |                                    |        | <b>0.08</b>  | (0.03) |              |        | 0.03         | (0.03) |
| EZ*Note                         |                                    |        | <b>-0.10</b> | (0.03) |              |        | -0.03        | (0.02) |
| R <sup>2</sup>                  | 0.06                               |        | 0.16         |        | 0.08         |        | 0.18         |        |
| <b>Chemie Selbstkonzept</b>     |                                    |        |              |        |              |        |              |        |
| Intercept                       | <b>2.63</b>                        | (0.05) | <b>2.70</b>  | (0.04) | <b>2.66</b>  | (0.03) | <b>2.68</b>  | (0.02) |
| Geschlecht                      | <b>-0.18</b>                       | (0.03) | <b>-0.20</b> | (0.03) | <b>-0.18</b> | (0.03) | <b>-0.20</b> | (0.02) |

|                                      |                     |                     |                     |                     |
|--------------------------------------|---------------------|---------------------|---------------------|---------------------|
| EZ                                   | -0.04 (0.09)        | <b>-0.07</b> (0.04) | -0.09 (0.04)        | <b>-0.08</b> (0.02) |
| PV                                   |                     | 0.02 (0.03)         |                     | 0.01 (0.01)         |
| Note                                 |                     | <b>0.42</b> (0.02)  |                     | <b>0.41</b> (0.01)  |
| Geschlecht*EZ                        | 0.03 (0.04)         | 0.00 (0.04)         | 0.06 (0.04)         | 0.01 (0.04)         |
| EZ*PV                                |                     | 0.05 (0.03)         |                     | 0.04 (0.02)         |
| EZ*Note                              |                     | <b>-0.08</b> (0.04) |                     | <b>-0.04</b> (0.02) |
| $R^2$                                | 0.01                | 0.29                | 0.01                | 0.27                |
| <b><i>Chemie Interesse</i></b>       |                     |                     |                     |                     |
| Intercept                            | <b>2.39</b> (0.05)  | <b>2.44</b> (0.04)  | <b>2.39</b> (0.03)  | <b>2.40</b> (0.02)  |
| Geschlecht                           | <b>-0.19</b> (0.04) | <b>-0.21</b> (0.03) | <b>-0.23</b> (0.03) | <b>-0.25</b> (0.03) |
| EZ                                   | -0.05 (0.08)        | <b>-0.07</b> (0.05) | -0.07 (0.03)        | <b>-0.07</b> (0.03) |
| PV                                   |                     | <b>0.03</b> (0.03)  |                     | <b>0.05</b> (0.02)  |
| Note                                 |                     | <b>0.33</b> (0.03)  |                     | <b>0.29</b> (0.02)  |
| Geschlecht*EZ                        | 0.04 (0.05)         | 0.02 (0.06)         | 0.09 (0.03)         | 0.05 (0.03)         |
| EZ*PV                                |                     | 0.04 (0.04)         |                     | -0.01 (0.04)        |
| EZ*Note                              |                     | -0.08 (0.04)        |                     | -0.02 (0.02)        |
| $R^2$                                | 0.01                | 0.16                | 0.01                | 0.14                |
| <b><i>Biologie Selbstkonzept</i></b> |                     |                     |                     |                     |
| Intercept                            | <b>2.83</b> (0.04)  | <b>2.90</b> (0.03)  | <b>2.80</b> (0.02)  | <b>2.82</b> (0.02)  |
| Geschlecht                           | 0.03 (0.03)         | -0.03 (0.03)        | 0.02 (0.02)         | -0.03 (0.02)        |
| EZ                                   | <b>-0.14</b> (0.06) | <b>-0.15</b> (0.03) | <b>-0.09</b> (0.04) | <b>-0.07</b> (0.02) |
| PV                                   |                     | <b>0.01</b> (0.02)  |                     | <b>0.06</b> (0.01)  |
| Note                                 |                     | <b>0.33</b> (0.02)  |                     | <b>0.27</b> (0.01)  |
| Geschlecht*EZ                        | <b>0.08</b> (0.03)  | 0.06 (0.04)         | <b>0.07</b> (0.03)  | 0.04 (0.03)         |
| EZ*PV                                |                     | 0.09 (0.02)         |                     | 0.02 (0.02)         |
| EZ*Note                              |                     | -0.08 (0.03)        |                     | 0.00 (0.02)         |
| $R^2$                                | 0.01                | 0.22                | 0.00                | 0.20                |
| <b><i>Biologie Interesse</i></b>     |                     |                     |                     |                     |
| Intercept                            | <b>2.61</b> (0.04)  | <b>2.66</b> (0.03)  | <b>2.45</b> (0.02)  | <b>2.47</b> (0.02)  |
| Geschlecht                           | 0.05 (0.03)         | 0.00 (0.03)         | 0.05 (0.03)         | 0.01 (0.02)         |
| EZ                                   | <b>-0.23</b> (0.07) | <b>-0.23</b> (0.05) | <b>-0.08</b> (0.03) | <b>-0.07</b> (0.03) |
| PV                                   |                     | <b>0.03</b> (0.02)  |                     | <b>0.08</b> (0.02)  |
| Note                                 |                     | <b>0.23</b> (0.03)  |                     | <b>0.19</b> (0.02)  |
| Geschlecht*EZ                        | <b>0.17</b> (0.04)  | <b>0.15</b> (0.05)  | <b>0.14</b> (0.03)  | <b>0.13</b> (0.03)  |
| EZ*PV                                |                     | 0.07 (0.03)         |                     | 0.00 (0.03)         |
| EZ*Note                              |                     | -0.06 (0.04)        |                     | -0.01 (0.02)        |
| $R^2$                                | 0.02                | 0.11                | 0.01                | 0.09                |
| <b><i>Deutsch Selbstkonzept</i></b>  |                     |                     |                     |                     |
| Intercept                            | <b>3.13</b> (0.02)  | <b>3.24</b> (0.01)  | <b>3.14</b> (0.01)  | <b>3.24</b> (0.01)  |
| Geschlecht                           | <b>0.19</b> (0.02)  | <b>0.06</b> (0.02)  | <b>0.18</b> (0.01)  | <b>0.04</b> (0.01)  |
| EZ                                   | <b>0.08</b> (0.02)  | 0.03 (0.02)         | <b>0.03</b> (0.02)  | 0.00 (0.01)         |
| PV                                   |                     | <b>0.11</b> (0.01)  |                     | <b>0.05</b> (0.01)  |
| Note                                 |                     | <b>0.22</b> (0.01)  |                     | <b>0.26</b> (0.01)  |
| Geschlecht*EZ                        | -0.04 (0.03)        | -0.01 (0.02)        | 0.01 (0.02)         | 0.02 (0.02)         |
| EZ*PV                                |                     | -0.02 (0.02)        |                     | 0.01 (0.01)         |
| EZ*Note                              |                     | <b>-0.05</b> (0.01) |                     | <b>-0.04</b> (0.01) |
| $R^2$                                | 0.03                | 0.22                | 0.03                | 0.22                |

*Anmerkungen.* EZ = Erhebungszeitpunkt, PV = Testleistung. Fett gedruckte Regressionskoeffizienten sind statistisch signifikant ( $p < .05$ ). Bei den schulfachbezogenen Noten entsprechen höhere numerische Werte besseren Leistungen (1 [*ungenügend* oder *mangelhaft*] bis 5 [*sehr gut*]). Reformländer = Berlin, Bremen, Hamburg, Rheinland-Pfalz, Schleswig-Holstein.
